# Supplementary material for: Possible Roles of Transition Metal Cations in the Formation of Interstellar Benzene via Catalytic Acetylene Cyclotrimerization
Source: MDPI journal article supplement (doi:10.3390/molecules28217454), 2023-11-06
Supplement: s1 [file s1]

# Possible Roles of Transition Metal Cations in the Formation of Interstellar Benzene via Catalytic Acetylene Cyclotrimerization

Tatsuhiko Murakami <sup>1,2,\*</sup>, Naoki Matsumoto <sup>1</sup>, Takashi Fujihara <sup>1,3</sup> and Toshiyuki Takayanagi <sup>1</sup>

<sup>1</sup> Department of Chemistry, Saitama University, Shimo-Okubo 255, Sakura-ku, Saitama City, Saitama, 338-8570, Japan

<sup>2</sup> Department of Materials & Life Sciences, Faculty of Science & Technology, Sophia University, 7-1 Kioicho, Chiyoda-ku, Tokyo, 102-8554, Japan

<sup>3</sup> Comprehensive Analysis Center for Science, Saitama University, Shimo-Okubo 255, Sakura-ku, Saitama City, Saitama, 338-8570, Japan

\* Correspondence: murakamit@mail.saitama-u.ac.jp; Tel.: +81-48-858-9113 (T.M.)

## Supplementary Material

### Computational Details

The UCCSD(T)/6-311G(d) implemented in Gaussian09 and the explicitly correlated local coupled-cluster with pair natural orbital (PNO-LCCSD(T)-F12) [64,65] calculations using the cc-pVTZ basis set implemented in Molpro 2022 [66] were performed to compare the potential barrier height from the DFT-D3 results with those obtained at the CCSD(T)-level. Moreover, 2-state averaged complete active space second-order perturbation theory using the density fitting (DF-CASPT2) method [67] with the cc-pVTZ basis set implemented in Molpro 2022 was employed to consider the multireference behavior in the transition between *d* orbitals (See Table S4).

**Table. S1.** Relative Energies (in kcal/mol) Calculated Using B3LYP-D3(BJ)/def2-TZVP at the Benzene-Transition-Metal (benzene-TM) Complex and the Product Fragments (Benzene + TM) for the Neutral Sc and Ti-Catalyst Systems. The Zero Energy is Defined as the Energy Level of the Reactants containing Metal Cations.

|         | (benzene-TM) complex | benzene + TM  |
|---------|----------------------|---------------|
| Sc(0)   |                      |               |
| Quartet | -233.0 (-7.3)        | -207.5 (32.8) |
| Doublet | -240.3 (0.0)         | -228.6 (11.7) |
| Ti(0)   |                      |               |
| Quintet | -238.3 (-16.2)       | -221.4 (0.7)  |
| Triplet | -248.7 (-26.6)       | -221.6 (0.5)  |
| Singlet | -222.1 (0.0)         | -187.1 (35.0) |

**Table. S2.** Vertical Excitation Energies (in kcal/mol) at the Stationary Points for ScNC(C<sub>6</sub>H<sub>6</sub>) and TiNC(C<sub>6</sub>H<sub>6</sub>) Calculated Using B3LYP-D3(BJ)/def2-TZVP.

|                                    | Reactant | INT1  | TS1   | INT2  | TS2   | PC     | Product |
|------------------------------------|----------|-------|-------|-------|-------|--------|---------|
| ScNC-C <sub>6</sub> H <sub>6</sub> |          |       |       |       |       |        |         |
| Quintet                            | 155.2    | 127.9 | 124.1 | 85.7  | 82.0  | 33.9   | 60.3    |
| Triplet                            | 66.9     | 49.6  | 48.0  | 9.6   | 1.8   | -71.7  | -37.3   |
| Singlet                            | 0.0      | -16.9 | -14.0 | -57.1 | -57.0 | -91.2  | -38.1   |
| TiNC-C <sub>6</sub> H <sub>6</sub> |          |       |       |       |       |        |         |
| Sextet                             | 155.2    | 95.7  | 87.4  | 72.3  | 65.8  | 0.4    | 17.6    |
| Quartet                            | 44.7     | 15.9  | 13.0  | -10.4 | -19.2 | -109.7 | -63.6   |
| Doublet                            | 0.0      | -48.9 | -46.7 | -79.3 | -78.7 | -119.4 | -50.2   |

**Table. S3.** Relative Energies (in kcal/mol) at the Stationary Points for the  $^1\text{Sc}^+(\text{C}_6\text{H}_6)$ ,  $^2\text{Ti}^+(\text{C}_6\text{H}_6)$ ,  $^1\text{ScNC}(\text{C}_6\text{H}_6)$  and  $^2\text{TiNC}(\text{C}_6\text{H}_6)$  calculated by B3LYP-D3(BJ)/def2-TZVP, B3LYP-D3(BJ)/def2-SVPP, and PNO-LCCSD(T)-F12/cc-pVTZ. The PNO-LCCSD(T)-F12/cc-pVTZ and DF-CASPT2/cc-pVTZ. Calculations were Performed at the B3LYP-D3(BJ)/def2-TZVP Geometries for the  $^1\text{Sc}^+(\text{C}_6\text{H}_6)$  and  $^2\text{Ti}^+(\text{C}_6\text{H}_6)$ , and at the B3LYP-D3(BJ)/def2-SVPP Geometries for  $^1\text{ScNC}(\text{C}_6\text{H}_6)$  and  $^2\text{TiNC}(\text{C}_6\text{H}_6)$ .

|                                      | B3LYP-D3(BJ)/<br>def2-TZVP | B3LYP-D3(BJ)/<br>def2-SVPP | PNO-LCCSD(T)-<br>F12/cc-pVTZ | DF-CASPT2/<br>cc-pVTZ |
|--------------------------------------|----------------------------|----------------------------|------------------------------|-----------------------|
| $^1\text{Sc}^+-\text{C}_6\text{H}_6$ |                            |                            |                              |                       |
|                                      |                            |                            |                              | CAS(6e,8o)            |
| Reactant                             | 0.0                        | ---                        | 0.0                          | 0.0                   |
| INT1                                 | -59.2 (0.0)                | ---                        | -56.5 (0.0)                  | -50.0(0.0)            |
| TS1                                  | -56.8 (2.4)                | ---                        | -51.8 (4.7)                  | -36.3(13.7)           |
| PC                                   | -133.0                     | ---                        | -131.7                       | -112.5                |
| $^2\text{Ti}^+-\text{C}_6\text{H}_6$ |                            |                            |                              |                       |
|                                      |                            |                            |                              | CAS(7e,8o)            |
| Reactant                             | 0.0                        | ---                        | 0.0                          | 0.0                   |
| INT1                                 | -55.3 (0.0)                | ---                        | -51.7 (0.0)                  | -45.6(0.0)            |
| TS1                                  | -47.9 (7.4)                | ---                        | -42.9 (8.8)                  | -26.4(19.2)           |
| PC                                   | -126.9                     | ---                        | -121.3                       | -128.8                |
| $^1\text{ScNC}-\text{C}_6\text{H}_6$ |                            |                            |                              |                       |
|                                      |                            |                            |                              | CAS(6e,8o)            |
| Reactant                             | 0.0                        | 0.0                        | 0.0                          | 0.0                   |
| INT1                                 | -16.9 (0.0)                | -18.3 (0.0)                | -17.0 (0.0)                  | -17.1(0.0)            |
| TS1                                  | -14.0 (2.9)                | -16.0 (2.3)                | -9.7 (7.3)                   | -2.0(15.1)            |
| INT2                                 | -57.1                      | ---                        | ---                          | ---                   |
| TS2                                  | -57.0                      | ---                        | ---                          | ---                   |
| PC                                   | -91.2                      | -98.3                      | -89.1                        | -68.9                 |
| $^2\text{TiNC}-\text{C}_6\text{H}_6$ |                            |                            |                              |                       |
|                                      |                            |                            |                              | CAS(9e,9o)            |
| Reactant                             | 0.0                        | 0.0                        | 0.0                          | 0.0                   |
| INT1                                 | -48.9 (0.0)                | -55.7 (0.0)                | -44.8 (0.0)                  | -52.8(0.0)            |
| TS1                                  | -46.7 (2.2)                | -53.7 (2.0)                | -41.9 (2.9)                  | -37.9(14.9)           |
| INT2                                 | -79.3                      | -90.1                      | ---                          | ---                   |
| TS2                                  | -78.7                      | -89.8                      | ---                          | ---                   |
| PC                                   | -119.4                     | -131.0                     | -125.7                       | -124.5                |

**Table. S4.** Relative Energies (in kcal/mol) at the Stationary Points for the  $^1\text{Sc}^+(\text{C}_6\text{H}_6)$ ,  $^2\text{Ti}^+(\text{C}_6\text{H}_6)$ ,  $^1\text{ScNC}(\text{C}_6\text{H}_6)$  and  $^2\text{TiNC}(\text{C}_6\text{H}_6)$  calculated by 2-state averaged DF-CASPT2/cc-pVTZ.

|                                                 | Reactant | INT1  | TS1   | PC     |
|-------------------------------------------------|----------|-------|-------|--------|
| $\text{Sc}^+-\text{C}_6\text{H}_6$ , CAS(6e,8o) |          |       |       |        |
| S <sub>1</sub>                                  | 52.9     | 28.7  | 45.0  | -77.9  |
| S <sub>0</sub>                                  | 0.0      | -50.0 | -36.3 | -112.5 |
| $\text{Ti}^+-\text{C}_6\text{H}_6$ , CAS(7e,8o) |          |       |       |        |
| D <sub>1</sub>                                  | 47.8     | 19.0  | -18.8 | -90.5  |
| D <sub>0</sub>                                  | 0.0      | -45.6 | -26.4 | -128.8 |
| $\text{ScNC}-\text{C}_6\text{H}_6$ , CAS(6e,8o) |          |       |       |        |
| S <sub>1</sub>                                  | 84.4     | 82.1  | 93.1  | -39.9  |
| S <sub>0</sub>                                  | 0.0      | -17.1 | -2.0  | -68.9  |
| $\text{TiNC}-\text{C}_6\text{H}_6$ , CAS(9e,9o) |          |       |       |        |
| D <sub>1</sub>                                  | 34.9     | 5.7   | 8.4   | -109.7 |
| D <sub>0</sub>                                  | 0.0      | -52.8 | -37.9 | -124.5 |

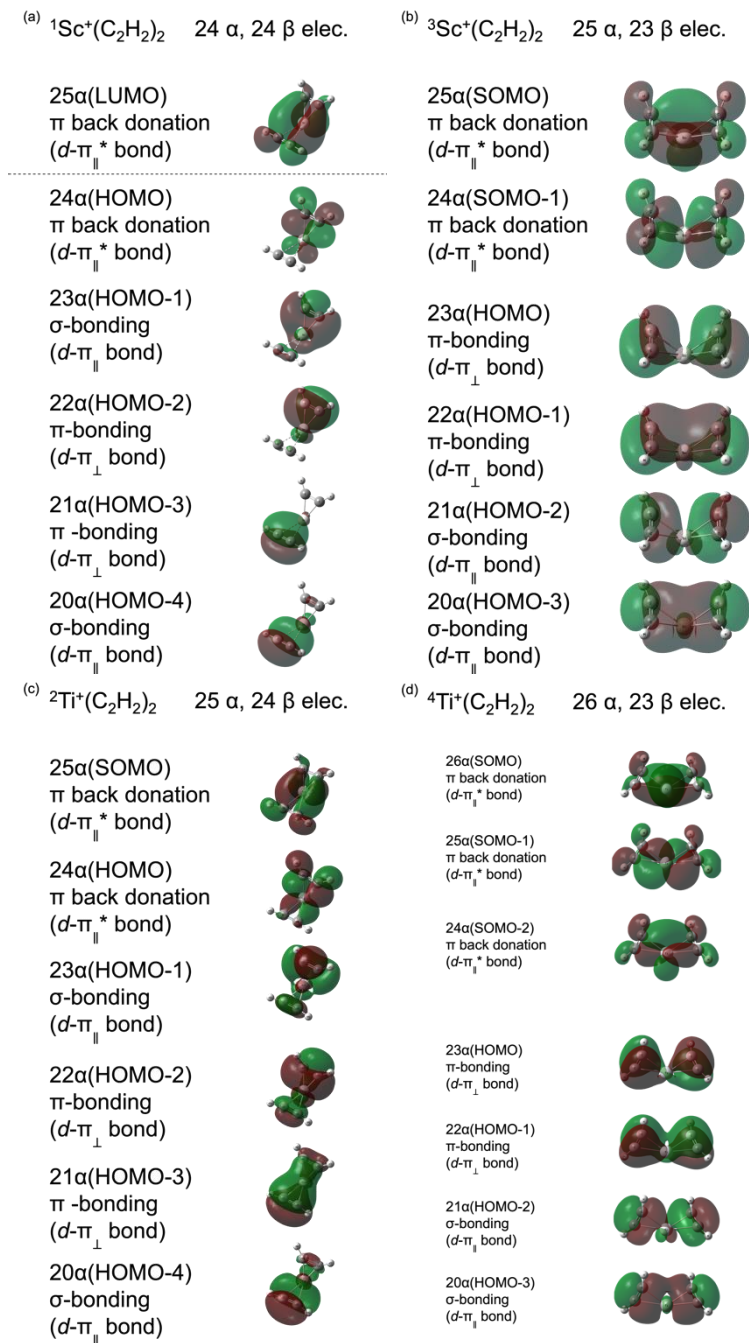

**Figure S1.** Molecular orbitals contributing to  $d-\pi_{\parallel}$  and  $d-\pi_{\perp}$  interactions and  $\pi$ -back-donation for (a) singlet  $\text{Sc}^+(\text{C}_2\text{H}_2)_2$ , (b) triplet  $\text{Sc}^+(\text{C}_2\text{H}_2)_2$ , (c) doublet  $\text{Ti}^+(\text{C}_2\text{H}_2)_2$ , and (d) quartet  $\text{Ti}^+(\text{C}_2\text{H}_2)_2$  calculated using B3LYP-D3(BJ)/def2-TZVP

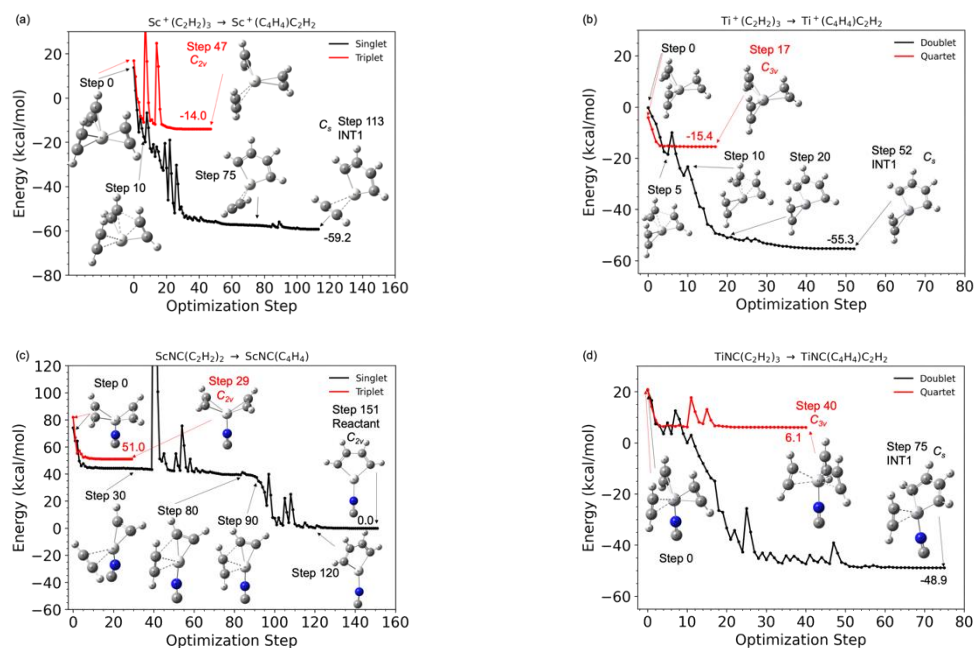

**Figure S2.** Potential energy minimization profiles calculated using B3LYP-D3(BJ)/def2-TZVP for (a)  $\text{Sc}^+(\text{C}_2\text{H}_2)_3$  of singlet (black line) and triplet (red line) states, (b)  $\text{Ti}^+(\text{C}_2\text{H}_2)_3$  of doublet (black) and quartet (red), (c)  $\text{ScNC}(\text{C}_2\text{H}_2)_2$  of singlet (black) and triplet (red), and (d)  $\text{TiNC}(\text{C}_2\text{H}_2)_3$  of doublet (black) and quartet (red), with the molecular structures. The optimized energies (in kcal/mol) and those symmetries are written in each figure. The potential energies for the reactants are set as 0 kcal/mol.

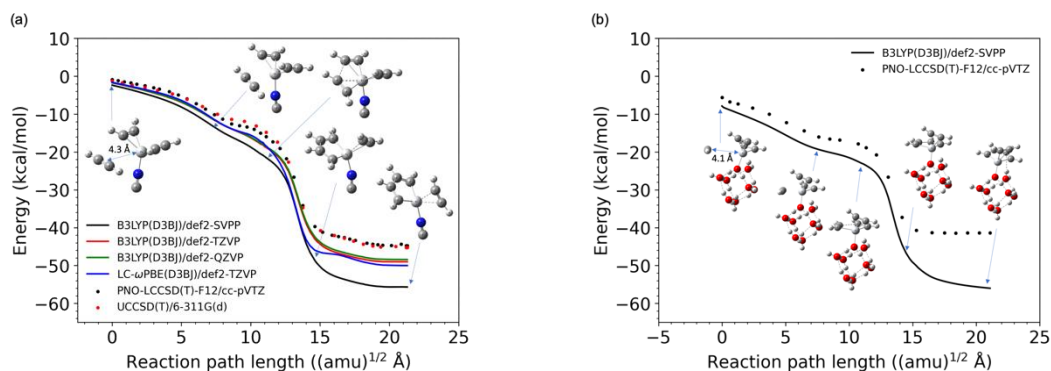

**Figure S3.** (a) Minimum energy paths (MEPs) for the doublet  $\text{TiNC}(\text{C}_2\text{H}_2)_2$  with isolated acetylene; black, red, green, and blue lines, and black and red dots represent the calculations at the B3LYP-D3(BJ)/def2-SVPP, B3LYP-D3(BJ)/def2-TZVP, B3LYP-D3(BJ)/def2-QZVP, LC- $\omega$ PBE-D3(BJ)/def2-TZVP, and PNO-LCCSD(T)-F12/cc-pVTZ and UCCSD(T)/6-311G(d) levels; (b) MEPs of doublet  $\text{Ti}^+(\text{H}_2\text{O})_8(\text{C}_2\text{H}_2)_2$  with isolated acetylene; black line and dots represent calculations at the B3LYP-D3(BJ)/def2-SVPP and PNO-LCCSD(T)-F12/cc-pVTZ levels.

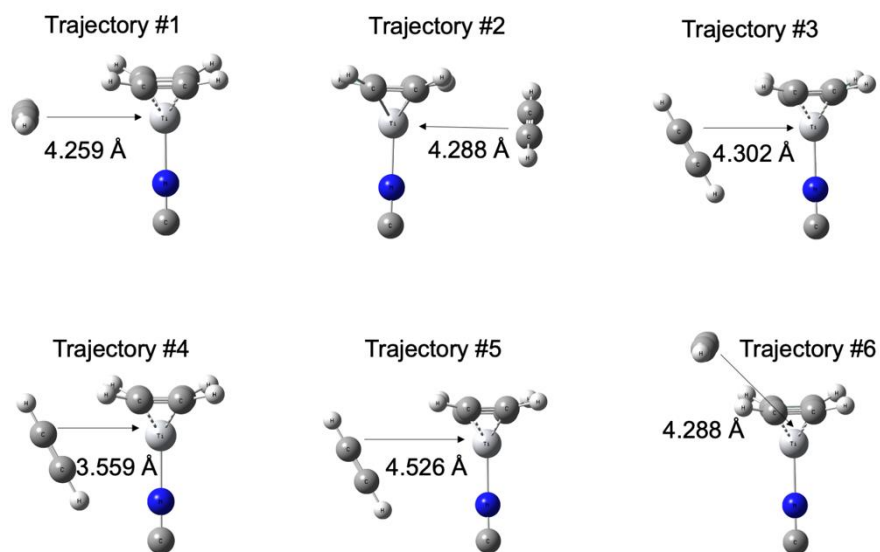

**Figure S4.** Initial configurations of the  $\text{TiNC}(\text{C}_2\text{H}_2)_3$  for molecular dynamics

Cartesian coordinates for all the stationary points on the potential energy surfaces obtained from the UB3LYP/def2-TZVP (GD3BJ dispersion, int=ultrafine) calculations.

(C<sub>2</sub>H<sub>2</sub>)<sub>2</sub>-Sc<sup>+</sup> reactant

|    |                 |                 |                |
|----|-----------------|-----------------|----------------|
| Sc | 0.097474288682  | -2.205311655782 | 0.959971762699 |
| C  | 1.233247522190  | 0.058273724648  | 1.776837793411 |
| C  | -1.822905288155 | -2.677396896215 | 1.371009480728 |
| C  | -1.048584707504 | -3.075506831325 | 2.377355205909 |
| C  | 0.533249008704  | 0.418151872323  | 0.866576496318 |
| H  | 1.860108022735  | -0.180964244123 | 2.610867547764 |
| H  | -2.895425706942 | -2.740660888374 | 1.220062763119 |
| H  | -1.283991642628 | -3.569162298679 | 3.314359533995 |
| H  | -0.081356087082 | 0.817106497528  | 0.086242886058 |

ENERGY = -915.255461876000

(C<sub>2</sub>H<sub>2</sub>)<sub>3</sub>-Sc<sup>+</sup> INT1

|    |                 |                 |                 |
|----|-----------------|-----------------|-----------------|
| Sc | -0.206756658393 | -1.770025575715 | 0.266380687999  |
| C  | 0.830438703292  | -0.034815187231 | 0.664603847285  |
| C  | -1.185604547215 | 0.315112442052  | -0.849233975606 |
| C  | -0.936870477431 | -1.992995470830 | 2.742689809396  |
| C  | -1.911519046704 | -2.348605418795 | 2.130111320677  |
| C  | 0.020754144955  | 0.754056472984  | -0.090982140731 |
| C  | -1.681937798607 | -0.949062515940 | -0.914845395194 |
| H  | 1.678906061440  | 0.413832428305  | 1.168632063843  |
| H  | -1.669420617724 | 1.131304426427  | -1.382036291216 |
| H  | -0.115686345578 | -1.676688920276 | 3.349662573224  |
| H  | -2.815496785550 | -2.661680138951 | 1.653010895519  |
| H  | 0.220163077726  | 1.818780931792  | -0.194536344602 |
| H  | -2.572962119865 | -1.133377780210 | -1.504189194562 |

ENERGY = -992.716588706000

ZPVE = 0.090452944110

(C<sub>2</sub>H<sub>2</sub>)<sub>3</sub>-Sc<sup>+</sup> TS1

|    |                 |                 |                 |
|----|-----------------|-----------------|-----------------|
| Sc | -0.062474782280 | -1.768449197184 | 0.275330778529  |
| C  | 0.856374595403  | 0.034138012570  | 0.690313767972  |
| C  | -1.262915840114 | 0.129474641713  | -0.730939211514 |
| C  | -0.976197186398 | -2.132637475247 | 2.385923469411  |
| C  | -2.050971925174 | -1.907188369972 | 1.847610181232  |
| C  | -0.040548485539 | 0.695673954947  | -0.080542260334 |
| C  | -1.860525018488 | -1.062910374280 | -0.473064584023 |
| H  | 1.680292177566  | 0.579511869812  | 1.133645182631  |
| H  | -1.691729342782 | 0.801752265873  | -1.470955026111 |
| H  | -0.293853118626 | -2.370633894228 | 3.178644155084  |
| H  | -3.079789236981 | -1.779878668519 | 1.594709637141  |
| H  | 0.083456438539  | 1.752685644786  | -0.306476618102 |
| H  | -2.812091985126 | -1.314706190276 | -0.925764131914 |

ENERGY = -992.712793628000



ZPVE = 0.090666861636

(C<sub>6</sub>H<sub>6</sub>)-Sc<sup>+</sup> Product

|    |                 |                 |                 |
|----|-----------------|-----------------|-----------------|
| Sc | 0.054451903782  | -1.950497327073 | 0.031073149588  |
| C  | 0.265170655219  | -0.222510042156 | 1.375035121244  |
| C  | -1.269343852992 | -0.043884069116 | -0.530543497133 |
| C  | -0.745840803821 | -1.001085992363 | 2.070932124817  |
| C  | -1.847410132145 | -1.469288105544 | 1.392836115226  |
| C  | -0.167797257591 | 0.424345854372  | 0.147570742974  |
| C  | -2.007976505407 | -1.188721943767 | -0.024225790739 |
| H  | 1.102741559026  | 0.179181654172  | 1.924437823339  |
| H  | -1.559486669607 | 0.402014981362  | -1.472383843067 |
| H  | -0.597970526117 | -1.255678626688 | 3.111791841098  |
| H  | -2.572032686480 | -2.094749539595 | 1.896621298384  |
| H  | 0.414552607224  | 1.241113012446  | -0.257195831751 |
| H  | -2.897131050275 | -1.521056865098 | -0.537723285424 |

ENERGY = -992.834191153000

ZPVE = 0.100071499038

(C<sub>2</sub>H<sub>2</sub>)<sub>2</sub>-Ti<sup>+</sup> reactant

|    |                 |                 |                |
|----|-----------------|-----------------|----------------|
| Ti | 0.177285724764  | -2.144402634491 | 0.922796115781 |
| C  | 1.048497735297  | -0.230652703652 | 1.816399941952 |
| C  | -1.698251413067 | -2.512179839088 | 1.352179065275 |
| C  | -0.934418925476 | -2.904757090478 | 2.345198879580 |
| C  | 0.338048482888  | 0.134447228248  | 0.892999003397 |
| H  | 1.698526786872  | -0.322273847484 | 2.665006672270 |
| H  | -2.753339241573 | -2.485674857637 | 1.110881690566 |
| H  | -1.053634678313 | -3.359240078851 | 3.320580922448 |
| H  | -0.230899061389 | 0.669263103432  | 0.157241178732 |

ENERGY = -1003.995990090000

(C<sub>2</sub>H<sub>2</sub>)<sub>3</sub>-Ti<sup>+</sup> INT1

|    |                 |                 |                 |
|----|-----------------|-----------------|-----------------|
| Ti | -0.497263490978 | -1.685279133525 | -0.518784864088 |
| C  | 0.328231007018  | 0.005129336000  | -1.129934059274 |
| C  | -0.743094222149 | 0.024878890587  | 1.184582071152  |
| C  | -2.162879385484 | -2.202177447319 | -1.971467027559 |
| C  | -1.429180498512 | -3.180419416535 | -1.950994110468 |
| C  | 0.061763613113  | 0.604749728406  | 0.055477774157  |
| C  | -1.335471971610 | -1.193507782080 | 1.204001266567  |
| H  | 0.861343375636  | 0.509951661296  | -1.925033687372 |
| H  | -0.832631323013 | 0.708938611373  | 2.025175617303  |
| H  | -2.921189940051 | -1.461118017207 | -2.131338488281 |
| H  | -0.986055833194 | -4.142244394998 | -2.129174730908 |
| H  | 0.417255681646  | 1.609438443722  | 0.271760418086  |
| H  | -1.956472338200 | -1.520173857246 | 2.027946667757  |

ENERGY = -1081.450802790000

ZPVE = 0.090482171252

(C<sub>2</sub>H<sub>2</sub>)<sub>3</sub>-Ti<sup>+</sup> TS1

|    |                 |                 |                 |
|----|-----------------|-----------------|-----------------|
| Ti | -0.282729126217 | -1.910814398853 | -0.399406976048 |
| C  | -0.083922792355 | -0.148859351942 | -1.295480070088 |
| C  | -0.953244561810 | 0.061570943803  | 1.049583314353  |
| C  | -1.788841340048 | -1.578997599169 | -2.059824747610 |
| C  | -1.643898579034 | -2.782046266675 | -1.765179015473 |
| C  | -0.327922857431 | 0.590699555703  | -0.168932094693 |
| C  | -1.219434423918 | -1.258282513077 | 1.241798788494  |
| H  | 0.286010723428  | 0.290610726267  | -2.213044147623 |
| H  | -1.195677956373 | 0.807034250095  | 1.803053075195  |
| H  | -2.184729631544 | -0.722056386450 | -2.567110246299 |
| H  | -1.975114619435 | -3.798782502668 | -1.905736188497 |
| H  | -0.041591420998 | 1.638756786497  | -0.140522767135 |
| H  | -1.742298494276 | -1.609051133534 | 2.123301675424  |

ENERGY = -1081.439120400000

ZPVE = 0.090404189676

(C<sub>6</sub>H<sub>6</sub>)-Ti<sup>+</sup> product

|    |                 |                 |                 |
|----|-----------------|-----------------|-----------------|
| Ti | 0.110108732567  | -1.943691118897 | -0.333150118513 |
| C  | -0.645592758131 | -0.167936063253 | -1.636618839464 |
| C  | -1.120178250839 | -0.302251830599 | 0.769430852795  |
| C  | -1.494388443912 | -1.231385827939 | -1.863414748968 |
| C  | -2.009386968743 | -1.999656761753 | -0.754337947050 |
| C  | -0.266147924965 | 0.184555648957  | -0.288508654297 |
| C  | -1.968906669135 | -1.365755883655 | 0.542622779149  |
| H  | -0.206712266360 | 0.363366327673  | -2.470531411246 |
| H  | -1.040940609370 | 0.127167289454  | 1.759195638275  |
| H  | -1.723150695583 | -1.536667843991 | -2.875730724861 |
| H  | -2.688501570518 | -2.819549085206 | -0.934052086113 |
| H  | 0.383234580356  | 1.029133373687  | -0.113281021337 |
| H  | -2.557392845096 | -1.772866593845 | 1.353950123967  |

ENERGY = -1081.564895050000

ZPVE = 0.100697598897

(C<sub>2</sub>H<sub>2</sub>)<sub>2</sub>-ScNC reactant

|    |                 |                 |                 |
|----|-----------------|-----------------|-----------------|
| Sc | 0.307062463194  | -2.373199834468 | 0.230185285769  |
| C  | 0.066091394426  | -0.711583669452 | 2.214733529948  |
| C  | -1.162541413454 | -2.887640520491 | 1.655588023514  |
| C  | -0.936057074243 | -1.805430920861 | 2.441491950636  |
| C  | 0.936405915339  | -0.596533301592 | 1.180590532711  |
| H  | 0.036030241385  | 0.037901284932  | 3.005998541260  |
| H  | -1.930472708991 | -3.585963808186 | 1.969642047667  |
| H  | -1.509255726009 | -1.648708162762 | 3.355611019953  |
| H  | 1.596487780341  | 0.263822077742  | 1.171519101413  |
| N  | 0.925525751811  | -3.301345184846 | -1.516817036536 |

|   |                |                 |                 |
|---|----------------|-----------------|-----------------|
| C | 1.276752866196 | -3.827593090035 | -2.508091076368 |
|---|----------------|-----------------|-----------------|

ENERGY = -1008.474431880000

(C<sub>2</sub>H<sub>2</sub>)<sub>3</sub>-ScNC iNT1

|    |                 |                 |                 |
|----|-----------------|-----------------|-----------------|
| Sc | -0.043582593775 | -1.912635320651 | 0.208625706254  |
| C  | 0.831172501023  | -0.034999122371 | 0.699020011158  |
| C  | -1.244508294437 | 0.250917749665  | -0.746284930142 |
| C  | -0.946575346611 | -1.902694711794 | 2.706865737908  |
| C  | -1.892762533472 | -2.294870549159 | 2.076511791458  |
| C  | -0.071149321464 | 0.733902945486  | 0.035170724052  |
| C  | -1.616673952705 | -1.042634093291 | -0.931394831650 |
| H  | 1.642221459934  | 0.484037809237  | 1.201203285113  |
| H  | -1.809403556911 | 1.066558028444  | -1.200249015293 |
| H  | -0.131194959094 | -1.556234727887 | 3.298425259068  |
| H  | -2.752515177062 | -2.642841041446 | 1.552499570732  |
| H  | 0.023029089004  | 1.820807213494  | 0.020034908759  |
| H  | -2.490884507651 | -1.217340972025 | -1.551561676030 |
| N  | 0.920430817973  | -3.729949675508 | -0.116485860134 |
| C  | 1.415430681163  | -4.791809223618 | -0.204465117653 |

ENERGY = -1085.868191420000

ZPVE = 0.096850734417

(C<sub>2</sub>H<sub>2</sub>)<sub>3</sub>-ScNC TS1

|    |                 |                 |                 |
|----|-----------------|-----------------|-----------------|
| Sc | 0.017443350412  | -1.935948802219 | 0.310167172747  |
| C  | 0.897646947143  | -0.008338672902 | 0.614434910389  |
| C  | -1.279193225820 | 0.129094959358  | -0.668432068741 |
| C  | -1.039405761374 | -2.079321213512 | 2.428102454244  |
| C  | -2.063566523922 | -1.862373779387 | 1.796861046886  |
| C  | -0.047679807701 | 0.692110418488  | -0.061477490343 |
| C  | -1.799995837227 | -1.112222526206 | -0.474721659169 |
| H  | 1.750584599217  | 0.551507778513  | 0.985257926765  |
| H  | -1.782490594559 | 0.826733623829  | -1.338925506066 |
| H  | -0.380786788892 | -2.321493306812 | 3.234083761959  |
| H  | -3.083491065566 | -1.747104894250 | 1.512349872062  |
| H  | 0.055881135405  | 1.763025643141  | -0.240849457099 |
| H  | -2.743652413410 | -1.356615465697 | -0.952587198263 |
| N  | 1.001751067412  | -3.718088151407 | -0.151542812212 |
| C  | 1.539201528877  | -4.747590510944 | -0.328582123161 |

ENERGY = -1085.863465160000

ZPVE = 0.096970473682

(C<sub>2</sub>H<sub>2</sub>)<sub>3</sub>-ScNC iNT2

|    |                 |                 |                 |
|----|-----------------|-----------------|-----------------|
| Sc | 0.064270483785  | -2.025653973878 | 0.366637966873  |
| C  | 0.854340539988  | -0.120344325961 | 0.755174181917  |
| C  | -1.276074606854 | -0.112127545916 | -0.592858159217 |
| C  | -1.052590964721 | -1.809655510342 | 2.130538305421  |
| C  | -2.155192408946 | -1.445350718247 | 1.416325737776  |

|   |                 |                 |                 |
|---|-----------------|-----------------|-----------------|
| C | -0.018475517581 | 0.447498698378  | -0.124758193627 |
| C | -2.184321727884 | -0.916732944051 | 0.062208009864  |
| H | 1.701693518627  | 0.474099094646  | 1.079849173506  |
| H | -1.590488335558 | 0.241134932743  | -1.568227090981 |
| H | -1.194255632816 | -2.091313767626 | 3.168508853040  |
| H | -3.156933495918 | -1.585797612385 | 1.824281761704  |
| H | 0.212308424844  | 1.398847569657  | -0.605709070890 |
| H | -3.107858467638 | -1.103094968618 | -0.473839030432 |
| N | 1.167235607910  | -3.714509387988 | -0.178293413252 |
| C | 1.750703359810  | -4.667942913008 | -0.539728596727 |

ENERGY = -1085.932188310000

ZPVE = 0.102728974101

(C<sub>2</sub>H<sub>2</sub>)<sub>3</sub>-ScNC TS2

|    |                 |                 |                 |
|----|-----------------|-----------------|-----------------|
| Sc | -0.025317396459 | -2.123358200688 | -0.474293635015 |
| C  | -0.689006170987 | -0.030906887262 | -1.679733608138 |
| C  | -0.901811779262 | -0.191273907371 | 0.846505025708  |
| C  | -1.600553814975 | -1.065096523575 | -2.100335002519 |
| C  | -1.888526123282 | -2.215756063904 | -1.414742759052 |
| C  | -0.381354280047 | 0.353945202090  | -0.382002927393 |
| C  | -1.304083586670 | -1.485096234545 | 1.049483773935  |
| H  | -0.296304907236 | 0.598974414991  | -2.468558414617 |
| H  | -0.920871877915 | 0.528308570215  | 1.664442408630  |
| H  | -2.045143195473 | -0.877760076997 | -3.077282591496 |
| H  | -2.720953928428 | -2.826435423617 | -1.746529440757 |
| H  | 0.222183594783  | 1.247702886393  | -0.281219474924 |
| H  | -1.842055942997 | -1.727659760256 | 1.959262749318  |
| N  | 1.408279949271  | -3.646834117672 | -0.362572868983 |
| C  | 2.252404399688  | -4.462546347803 | -0.320802084686 |

ENERGY = -1085.931971270000

ZPVE = 0.102582716915

(C<sub>6</sub>H<sub>6</sub>)-ScNC product

|    |                 |                 |                 |
|----|-----------------|-----------------|-----------------|
| Sc | 0.081046127616  | -2.109766602949 | -0.503268236033 |
| C  | -0.437909962761 | -0.299875694083 | -1.685467995862 |
| C  | -0.980211624988 | -0.314183502635 | 0.718474348352  |
| C  | -1.629681153101 | -1.119608605031 | -1.894643602713 |
| C  | -2.278236255841 | -1.700282092720 | -0.833799874522 |
| C  | -0.331687230587 | 0.266542971634  | -0.342363278733 |
| C  | -1.793834205398 | -1.513939901884 | 0.532444923046  |
| H  | -0.008012646124 | 0.231905793037  | -2.519837254858 |
| H  | -0.843097287913 | 0.082021100764  | 1.715863944389  |
| H  | -1.965442309589 | -1.316204648423 | -2.904186133595 |
| H  | -3.123027213271 | -2.352662203474 | -1.010687421885 |
| H  | 0.314473084156  | 1.118537490689  | -0.177613740864 |
| H  | -2.378289120948 | -1.890419050243 | 1.357337140046  |
| N  | 1.563987928726  | -3.599896678888 | -0.413227378894 |
| C  | 2.391889411790  | -4.431410319377 | -0.363489202246 |

ENERGY = -1085.986438260000  
 ZPVE = 0.105895160876

(C<sub>2</sub>H<sub>2</sub>)<sub>2</sub>-TiNC reactant

|    |                 |                 |                 |
|----|-----------------|-----------------|-----------------|
| Ti | 0.163247331898  | -2.125588984227 | 0.941103114349  |
| C  | 1.067418298065  | -0.280604033595 | 1.793565177898  |
| C  | -1.735082947586 | -2.530346752185 | 1.372723042516  |
| C  | -0.970688135597 | -2.923218616469 | 2.366499966736  |
| C  | 0.346965426684  | 0.089654794947  | 0.856967466399  |
| H  | 1.752808989127  | -0.212387337046 | 2.616947672039  |
| H  | -2.794244681959 | -2.567264134569 | 1.149976261972  |
| H  | -1.129648402545 | -3.422817270252 | 3.314095228517  |
| H  | -0.132601977385 | 0.756565984593  | 0.165871682335  |
| N  | 1.197552904611  | -3.289931277513 | -0.314835477786 |
| C  | 1.840302684689  | -3.930337503681 | -1.062462214970 |

ENERGY = -1097.160702460000

(C<sub>2</sub>H<sub>2</sub>)<sub>3</sub>-TiNC INT1

|    |                 |                 |                 |
|----|-----------------|-----------------|-----------------|
| Ti | -0.340757997938 | -1.834096346571 | -0.603253905940 |
| C  | 0.280342993134  | 0.019958923992  | -1.154012978215 |
| C  | -0.878558075665 | 0.039089436991  | 1.082242183262  |
| C  | -2.157887351784 | -2.013282791172 | -1.865883394416 |
| C  | -1.537023275083 | -3.059520970536 | -2.056299747928 |
| C  | -0.153165481121 | 0.675832505576  | -0.051807037598 |
| C  | -1.195164775644 | -1.275332948218 | 1.152971038066  |
| H  | 0.801424308797  | 0.556322632217  | -1.938302551334 |
| H  | -1.153431209825 | 0.732359572369  | 1.876733423804  |
| H  | -2.920123250983 | -1.262982515334 | -1.932082362205 |
| H  | -1.188597032945 | -4.020301853715 | -2.372934067199 |
| H  | 0.003087611099  | 1.747482796481  | 0.068789899389  |
| H  | -1.726595616629 | -1.662865060816 | 2.014204990876  |
| N  | 0.999075701403  | -3.314139135495 | -0.577315904091 |
| C  | 1.826836873065  | -4.146912493818 | -0.515330623134 |

ENERGY = -1174.605344110000  
 ZPVE = 0.097298935122

(C<sub>2</sub>H<sub>2</sub>)<sub>3</sub>-TiNC TS1

|    |                 |                 |                 |
|----|-----------------|-----------------|-----------------|
| Ti | -0.318952137581 | -1.972546479416 | -0.556400102494 |
| C  | 0.102880746136  | -0.067984168698 | -1.162963647635 |
| C  | -0.950919025220 | 0.065335543363  | 1.074039919199  |
| C  | -1.795163584169 | -1.707886444699 | -2.254019673178 |
| C  | -1.925591756110 | -2.825164419965 | -1.732400807469 |
| C  | -0.349471154263 | 0.682303612930  | -0.121513889141 |
| C  | -1.093427815604 | -1.276041351992 | 1.212954461267  |
| H  | 0.526877338274  | 0.422973698073  | -2.033444237837 |
| H  | -1.271948298645 | 0.755879505720  | 1.854095316688  |

|   |                 |                 |                 |
|---|-----------------|-----------------|-----------------|
| H | -1.947574001380 | -0.868912277757 | -2.899450689901 |
| H | -2.366675622858 | -3.800286696389 | -1.628291683047 |
| H | -0.298832555723 | 1.770102855357  | -0.129352942336 |
| H | -1.528077055106 | -1.683065747674 | 2.119478746601  |
| N | 1.135993029470  | -3.322375577358 | -0.583850247363 |
| C | 2.009130032776  | -4.110473231495 | -0.567406653358 |

ENERGY = -1174.601843560000

ZPVE = 0.096779584821

(C<sub>2</sub>H<sub>2</sub>)<sub>3</sub>-TiNC INT2

|    |                 |                 |                 |
|----|-----------------|-----------------|-----------------|
| Ti | -0.209132109999 | -1.999416748521 | -0.424713692040 |
| C  | -0.662570943571 | -0.108587783154 | -1.676115220478 |
| C  | -0.900873860503 | -0.197776579087 | 0.914673441630  |
| C  | -1.539746049450 | -1.138330687726 | -2.173298394824 |
| C  | -1.896846057661 | -2.231299051646 | -1.429227544412 |
| C  | -0.369077405196 | 0.275411323068  | -0.356910520945 |
| C  | -1.290381202157 | -1.481150417496 | 1.160919345602  |
| H  | -0.147725377574 | 0.467015150387  | -2.435916822900 |
| H  | -0.873524454214 | 0.550864757402  | 1.707362772547  |
| H  | -1.823666818295 | -1.027827770001 | -3.222004820945 |
| H  | -2.685800293525 | -2.915708383485 | -1.709525879331 |
| H  | 0.305132495747  | 1.118072725806  | -0.271816793283 |
| H  | -1.768721797787 | -1.777891548084 | 2.083518956563  |
| N  | 1.224912632973  | -3.393894714618 | -0.500064814378 |
| C  | 2.123507084754  | -4.152099796096 | -0.520130591206 |

ENERGY = -1174.653870750000

ZPVE = 0.101944757719

(C<sub>2</sub>H<sub>2</sub>)<sub>3</sub>-TiNC TS2

|    |                 |                 |                 |
|----|-----------------|-----------------|-----------------|
| Ti | -0.070757582766 | -1.982461144262 | -0.378317492920 |
| C  | -0.627833395960 | -0.081775855964 | -1.680164507329 |
| C  | -0.982652908929 | -0.166421986795 | 0.855600272632  |
| C  | -1.490034685040 | -1.133859920320 | -2.108896922872 |
| C  | -1.831757488588 | -2.162172857766 | -1.263094923824 |
| C  | -0.373334036091 | 0.323873133639  | -0.361187532615 |
| C  | -1.362519582193 | -1.466552885815 | 1.054968823045  |
| H  | -0.140612718070 | 0.499956611872  | -2.453069625255 |
| H  | -1.039425173489 | 0.560593149288  | 1.662619108607  |
| H  | -1.797084145810 | -1.108177398687 | -3.155519162328 |
| H  | -2.669346241861 | -2.829747023738 | -1.416086237716 |
| H  | 0.248420684134  | 1.202431838942  | -0.249533770331 |
| H  | -1.927684499925 | -1.775872010366 | 1.923558327219  |
| N  | 1.238102961519  | -3.499085919876 | -0.591180412347 |
| C  | 2.093403753066  | -4.304520200153 | -0.628074793969 |

ENERGY = -1174.652896290000

ZPVE = 0.102373087908

(C<sub>6</sub>H<sub>6</sub>)-TiNC product

|    |                 |                 |                 |
|----|-----------------|-----------------|-----------------|
| Ti | -0.172617459958 | -2.001516933494 | -0.423176352207 |
| C  | -0.611260709803 | -0.101686736615 | -1.666275574045 |
| C  | -0.834717731701 | -0.195834286986 | 0.925661566333  |
| C  | -1.503641671424 | -1.119454813211 | -2.161019314870 |
| C  | -1.869138124756 | -2.210287286970 | -1.417892282118 |
| C  | -0.305135332785 | 0.274828200359  | -0.347787335966 |
| C  | -1.237890338929 | -1.475233492892 | 1.170600162798  |
| H  | -0.094281919153 | 0.470045789482  | -2.427550108985 |
| H  | -0.793635941130 | 0.550063107338  | 1.720339242584  |
| H  | -1.792662631861 | -1.002486764422 | -3.207630279225 |
| H  | -2.667918402454 | -2.884429110690 | -1.695229946433 |
| H  | 0.379519319798  | 1.109194436489  | -0.264368191483 |
| H  | -1.714019896664 | -1.769011650164 | 2.095289044924  |
| N  | 1.244022474872  | -3.412908961324 | -0.511755283262 |
| C  | 2.133159612057  | -4.181932415028 | -0.539808583081 |

ENERGY = -1174.653870880000

ZPVE = 0.101944449741

C<sub>2</sub>H<sub>2</sub>

|   |            |             |             |
|---|------------|-------------|-------------|
| C | 0.0000000  | -0.00000000 | -0.59839535 |
| C | 0.0000000  | 0.00000000  | 0.59839535  |
| H | -0.0000000 | 0.00000000  | -1.66107013 |
| H | -0.0000000 | -0.00000000 | 1.66107013  |

ENERGY = -77.366764176100

Benzene

|   |           |           |          |
|---|-----------|-----------|----------|
| C | 0.000000  | 1.390836  | 0.000000 |
| C | 1.204500  | 0.695418  | 0.000000 |
| C | 1.204500  | -0.695418 | 0.000000 |
| C | 0.000000  | -1.390836 | 0.000000 |
| C | -1.204500 | -0.695418 | 0.000000 |
| C | -1.204500 | 0.695418  | 0.000000 |
| H | 0.000000  | 2.473947  | 0.000000 |
| H | 2.142501  | 1.236973  | 0.000000 |
| H | 2.142501  | -1.236973 | 0.000000 |
| H | 0.000000  | -2.473947 | 0.000000 |
| H | -2.142501 | -1.236973 | 0.000000 |
| H | -2.142501 | 1.236973  | 0.000000 |

ENERGY = -232.356302845

ZPVE = 0.100180

Cartesian coordinates for all the stationary points on the potential energy surfaces obtained from the UB3LYP/def2-SVPP (GD3BJ dispersion, int=ultrafine) calculations.

(C<sub>2</sub>H<sub>2</sub>)<sub>2</sub>-ScNC reactant

|    |             |             |             |
|----|-------------|-------------|-------------|
| Sc | 0.73206386  | -2.62317335 | 0.78518408  |
| C  | 0.79899874  | -0.52505003 | 0.99728138  |
| C  | -1.41061001 | -1.52656705 | 1.82408906  |
| C  | -1.20646676 | -2.85579228 | 1.58496605  |
| C  | -0.44812082 | -0.40792300 | 1.54194869  |
| H  | 1.38311327  | 0.39235828  | 0.85337357  |
| H  | -2.35430375 | -1.16840983 | 2.26725136  |
| H  | -2.01154046 | -3.55296502 | 1.84829446  |
| H  | -0.85236325 | 0.57730348  | 1.82680749  |
| N  | 2.09522401  | -3.98198954 | 0.04752054  |
| C  | 2.88003466  | -4.76406677 | -0.37626478 |

ENERGY = -1008.08294433

ZPVE = 0.06897423

(C<sub>2</sub>H<sub>2</sub>)<sub>3</sub>-ScNC intermediate

|    |             |             |             |
|----|-------------|-------------|-------------|
| Sc | 0.01951004  | -1.81296521 | -0.42909919 |
| C  | 0.39721702  | 0.17731404  | -1.08687176 |
| C  | -1.03273045 | 0.19403352  | 1.01845147  |
| C  | -2.14287312 | -2.06473875 | -1.94189132 |
| C  | -1.61118697 | -3.12491659 | -2.20272168 |
| C  | -0.30874073 | 0.83838288  | -0.12376069 |
| C  | -1.09146255 | -1.14769036 | 1.26195766  |
| H  | 0.88999153  | 0.78190867  | -1.85981162 |
| H  | -1.53214513 | 0.91954436  | 1.68316444  |
| H  | -2.64642508 | -1.13307149 | -1.73571082 |
| H  | -1.12234275 | -4.06199290 | -2.42128610 |
| H  | -0.38649470 | 1.93910045  | -0.12408964 |
| H  | -1.64997303 | -1.47875066 | 2.14754401  |
| N  | 1.12031716  | -3.55992327 | -0.71664440 |
| C  | 1.56655084  | -4.61249886 | -1.02719765 |

ENERGY = -1085.38220221

ZPVE = 0.09729430

Transition state

|    |             |             |             |
|----|-------------|-------------|-------------|
| Sc | 0.02642658  | -1.98698001 | 0.26620108  |
| C  | 0.88519545  | -0.05547589 | 0.59921579  |
| C  | -1.30465229 | 0.15010045  | -0.65085507 |
| C  | -1.01753642 | -1.99352304 | 2.42186868  |
| C  | -2.05770370 | -1.84125871 | 1.77750006  |
| C  | -0.07150088 | 0.69233724  | -0.03064994 |
| C  | -1.76924847 | -1.13623036 | -0.54123168 |
| H  | 1.75558077  | 0.48263575  | 0.99813970  |
| H  | -1.85925242 | 0.88872889  | -1.25377745 |



|   |             |             |             |
|---|-------------|-------------|-------------|
| H | -0.31629015 | -2.17184834 | 3.22563914  |
| H | -3.08915918 | -1.77157300 | 1.47358759  |
| H | 0.03194813  | 1.78444232  | -0.14491199 |
| H | -2.72478113 | -1.38452308 | -1.02229057 |
| N | 1.00297855  | -3.77301524 | -0.14292085 |
| C | 1.55024177  | -4.81044188 | -0.31137566 |

ENERGY = -1085.37736093

ZPVE = 0.09730908

#### C<sub>6</sub>H<sub>6</sub>-ScNC product

|    |             |             |             |
|----|-------------|-------------|-------------|
| Sc | 0.03102572  | -2.12447558 | 0.21338149  |
| C  | 0.29499655  | -0.23789110 | 1.36322366  |
| C  | -1.16653868 | -0.19032395 | -0.63401904 |
| C  | -0.82360722 | -0.84732302 | 2.09272742  |
| C  | -1.92433170 | -1.33293730 | 1.41478275  |
| C  | -0.06577746 | 0.29521885  | 0.04391728  |
| C  | -1.99785129 | -1.24934252 | -0.04896224 |
| H  | 1.11410976  | 0.21921703  | 1.92110844  |
| H  | -1.38656351 | 0.16862522  | -1.64390698 |
| H  | -0.75160369 | -0.97463596 | 3.17704118  |
| H  | -2.72106527 | -1.84347539 | 1.96404920  |
| H  | 0.58293000  | 1.03741762  | -0.43089972 |
| H  | -2.91244102 | -1.55703814 | -0.55884138 |
| N  | 1.11895378  | -3.82625004 | -0.33374502 |
| C  | 1.73464822  | -4.78934921 | -0.64340618 |

ENERGY = -1085.50851755

ZPVE = 0.10585029

---

#### (C<sub>2</sub>H<sub>2</sub>)<sub>2</sub>-TiNC reactant

|    |             |             |             |
|----|-------------|-------------|-------------|
| Ti | 0.17484397  | -2.12737548 | 0.93145944  |
| C  | 1.06092107  | -0.27618422 | 1.80833250  |
| C  | -1.72079146 | -2.52388032 | 1.35815760  |
| C  | -0.95106520 | -2.91950178 | 2.35890134  |
| C  | 0.33325121  | 0.09771160  | 0.86269510  |
| H  | 1.74839800  | -0.20619455 | 2.64753990  |
| H  | -2.79192487 | -2.55290176 | 1.12573860  |
| H  | -1.10267146 | -3.42113469 | 3.32200332  |
| H  | -0.15914585 | 0.77399048  | 0.16845567  |
| N  | 1.19471814  | -3.30252183 | -0.31759244 |
| C  | 1.81949594  | -3.97828258 | -1.06523911 |

ENERGY = -1096.74716275

ZPVE = 0.06344085

#### (C<sub>2</sub>H<sub>2</sub>)<sub>3</sub>-TiNC intermediate

|    |             |             |             |
|----|-------------|-------------|-------------|
| Ti | -0.30480561 | -1.84491961 | -0.57800644 |
| C  | 0.28431439  | 0.00886381  | -1.15627032 |

|   |             |             |             |
|---|-------------|-------------|-------------|
| C | -0.92209872 | 0.07519196  | 1.05700906  |
| C | -2.14277776 | -1.96564301 | -1.82960030 |
| C | -1.54781945 | -3.03644248 | -2.03536416 |
| C | -0.18880424 | 0.70052369  | -0.07954537 |
| C | -1.20059654 | -1.25754026 | 1.14550723  |
| H | 0.81458261  | 0.53153725  | -1.96109415 |
| H | -1.24220066 | 0.78248131  | 1.83873147  |
| H | -2.88476612 | -1.17585427 | -1.87335453 |
| H | -1.21742444 | -4.01455375 | -2.36067955 |
| H | -0.05910761 | 1.79130881  | 0.00518021  |
| H | -1.74714863 | -1.65313544 | 2.00974061  |
| N | 0.98987794  | -3.36020696 | -0.57671380 |
| C | 1.80048632  | -4.22453317 | -0.52965231 |

ENERGY = -1174.10473566

ZPVE = 0.09760041

#### Transition state

|    |             |             |             |
|----|-------------|-------------|-------------|
| Ti | -0.30448053 | -1.96516125 | -0.54177284 |
| C  | 0.11550621  | -0.08260311 | -1.18132733 |
| C  | -0.95280396 | 0.08038244  | 1.06120879  |
| C  | -1.84456161 | -1.66527734 | -2.19261526 |
| C  | -1.86292644 | -2.84097900 | -1.76344814 |
| C  | -0.33946586 | 0.68543191  | -0.13823231 |
| C  | -1.10036052 | -1.26986176 | 1.20973871  |
| H  | 0.55431383  | 0.39920234  | -2.06484235 |
| H  | -1.28300298 | 0.78562174  | 1.84094920  |
| H  | -2.09171511 | -0.78299977 | -2.76870995 |
| H  | -2.21874355 | -3.86954939 | -1.72816458 |
| H  | -0.27715257 | 1.78455517  | -0.15416671 |
| H  | -1.54800199 | -1.67897987 | 2.12388337  |
| N  | 1.10140398  | -3.36077841 | -0.57255996 |
| C  | 1.98023924  | -4.15714488 | -0.53846677 |

ENERGY = -1174.10152612

ZPVE = 0.09699607

#### Intermediate

|    |             |             |             |
|----|-------------|-------------|-------------|
| Ti | -0.18093068 | -2.00343823 | -0.41658692 |
| C  | -0.66179182 | -0.08908164 | -1.68352756 |
| C  | -0.92732666 | -0.17652442 | 0.90732192  |
| C  | -1.54885964 | -1.12528278 | -2.16742320 |
| C  | -1.88493713 | -2.21929949 | -1.40074895 |
| C  | -0.37279474 | 0.30127547  | -0.35831406 |
| C  | -1.30773214 | -1.47475909 | 1.13697543  |
| H  | -0.15050860 | 0.49669922  | -2.45542513 |
| H  | -0.93434786 | 0.57920233  | 1.71066420  |
| H  | -1.86648737 | -1.01514613 | -3.21928160 |
| H  | -2.69217536 | -2.91457142 | -1.65214265 |
| H  | 0.30053465  | 1.16004167  | -0.26830543 |

|   |             |             |             |
|---|-------------|-------------|-------------|
| H | -1.81757444 | -1.78949372 | 2.05206982  |
| N | 1.22035328  | -3.42453720 | -0.48601823 |
| C | 2.09146343  | -4.22887703 | -0.48763648 |

ENERGY = -1174.15953081  
 ZPVE = 0.10213188

Transition state

|    |             |             |             |
|----|-------------|-------------|-------------|
| Ti | -0.07119854 | -1.99068463 | -0.38531404 |
| C  | -0.63731482 | -0.06718053 | -1.68796093 |
| C  | -0.97584447 | -0.16062306 | 0.86742103  |
| C  | -1.49956474 | -1.12846049 | -2.12700281 |
| C  | -1.82326505 | -2.17671563 | -1.28650405 |
| C  | -0.37693326 | 0.33661700  | -0.36157283 |
| C  | -1.34091835 | -1.47253315 | 1.06707653  |
| H  | -0.15105855 | 0.52930105  | -2.46748957 |
| H  | -1.03701548 | 0.57668536  | 1.68243790  |
| H  | -1.82256774 | -1.08601791 | -3.18118818 |
| H  | -2.65769703 | -2.86656165 | -1.45128658 |
| H  | 0.25191247  | 1.22581835  | -0.25224713 |
| H  | -1.89591941 | -1.79932450 | 1.95164351  |
| N  | 1.23387469  | -3.50234806 | -0.56873050 |
| C  | 2.07039522  | -4.34176462 | -0.58766120 |

ENERGY = -1174.15917632  
 ZPVE = 0.10237256

C<sub>6</sub>H<sub>6</sub>-TiNC product

|    |             |             |             |
|----|-------------|-------------|-------------|
| Ti | -0.01033064 | -1.99543846 | -0.51795939 |
| C  | -0.48996145 | -0.22092812 | -1.64636116 |
| C  | -0.89238046 | -0.37625688 | 0.79060734  |
| C  | -1.59929496 | -1.12674636 | -1.87175405 |
| C  | -2.24103830 | -1.74456903 | -0.78787546 |
| C  | -0.25053608 | 0.24146657  | -0.29326635 |
| C  | -1.80165071 | -1.48350093 | 0.56887588  |
| H  | 0.01893507  | 0.24918977  | -2.48866199 |
| H  | -0.62587454 | -0.09556886 | 1.81267121  |
| H  | -1.86322180 | -1.41003335 | -2.89377025 |
| H  | -3.00275699 | -2.50701782 | -0.96919879 |
| H  | 0.51375905  | 1.00132082  | -0.11189587 |
| H  | -2.29048482 | -1.97380703 | 1.41154751  |
| N  | 1.40675256  | -3.42240596 | -0.49189873 |
| C  | 2.24168038  | -4.26331549 | -0.47642158 |

ENERGY = -1174.22473953  
 ZPVE = 0.10575075

---

(C<sub>2</sub>H<sub>2</sub>)<sub>2</sub>-MnNC reactant

|    |            |             |            |
|----|------------|-------------|------------|
| Mn | 0.11697491 | -1.58659068 | 0.05277222 |
|----|------------|-------------|------------|

|   |             |             |             |
|---|-------------|-------------|-------------|
| C | 0.98222712  | -0.28700454 | 1.41266344  |
| C | -1.53000422 | -0.58686902 | -0.95980148 |
| C | 0.06667432  | 0.41159553  | 0.91453257  |
| C | -1.38255631 | -1.76576532 | -1.36346847 |
| H | 1.82303915  | -0.49281700 | 2.06783314  |
| H | -2.00461569 | 0.38689604  | -0.94048049 |
| H | -0.52136841 | 1.31440428  | 0.80062464  |
| H | -1.61174253 | -2.64040628 | -1.96435461 |
| N | 1.06858674  | -3.26694843 | 0.13757610  |
| C | 1.65036628  | -4.29415465 | 0.18958376  |

ENERGY = -1398.25567828

ZPVE = 0.06423274

(C<sub>2</sub>H<sub>2</sub>)<sub>3</sub>-MnNC intermediate

|    |             |             |             |
|----|-------------|-------------|-------------|
| Mn | -0.03313293 | -1.66058296 | 0.21950881  |
| C  | 0.93463301  | -0.30535691 | 1.46716339  |
| C  | -1.51965328 | -0.58319557 | -0.97216783 |
| C  | -1.89553398 | -2.33330028 | 2.16312244  |
| C  | -1.18759665 | -3.31457004 | 2.08664997  |
| C  | 0.07870250  | 0.41615373  | 0.90373662  |
| C  | -1.43396570 | -1.78619135 | -1.31334371 |
| H  | 1.76024375  | -0.52338745 | 2.13666084  |
| H  | -1.90934118 | 0.42564506  | -1.03517095 |
| H  | -2.54130642 | -1.47806269 | 2.25410782  |
| H  | -0.54719846 | -4.17704286 | 2.00386010  |
| H  | -0.43185321 | 1.34929070  | 0.69855017  |
| H  | -1.67463448 | -2.66971723 | -1.89551127 |
| N  | 1.11962621  | -3.24179317 | 0.08118150  |
| C  | 1.76695668  | -4.22852492 | 0.05687325  |

ENERGY = -1475.54158384

ZPVE = 0.09826227

Transition state (TS<sub>i</sub>)

|    |             |             |             |
|----|-------------|-------------|-------------|
| Mn | -0.00015606 | -1.75285569 | 0.24121908  |
| C  | 0.76085104  | -0.23283701 | 1.30305569  |
| C  | -1.36162696 | -0.35222279 | -0.78002581 |
| C  | -1.87402255 | -2.35789415 | 2.15946679  |
| C  | -1.18517251 | -3.35408721 | 2.10292354  |
| C  | -0.14555331 | 0.40871835  | 0.64730283  |
| C  | -1.37560625 | -1.56974180 | -1.20504938 |
| H  | 1.51581585  | -0.00673519 | 2.05477793  |
| H  | -1.85962033 | 0.59482776  | -0.97702175 |
| H  | -2.50417070 | -1.48931847 | 2.23390088  |
| H  | -0.56383769 | -4.23224875 | 2.04108134  |
| H  | -0.54468371 | 1.41756849  | 0.56591074  |
| H  | -1.90530393 | -2.14736617 | -1.96132675 |
| N  | 1.13746433  | -3.30396984 | 0.09945681  |
| C  | 1.79627587  | -4.28356775 | 0.06083435  |

ENERGY = -1475.53431125  
 ZPVE = 0.09400919

Intermediate

|    |             |             |             |
|----|-------------|-------------|-------------|
| Mn | -0.13418892 | -1.97043777 | 0.38428408  |
| C  | 0.88355768  | -0.25632692 | 0.23109020  |
| C  | -1.29965815 | 0.45004199  | -0.49235027 |
| C  | -2.03025162 | -3.00482499 | 1.78483848  |
| C  | -1.20553014 | -3.89816165 | 1.75548162  |
| C  | 0.10829039  | 0.76214944  | -0.19595291 |
| C  | -1.69295742 | -0.82798510 | -0.27932080 |
| H  | 1.94848396  | -0.19171102 | 0.48340832  |
| H  | -1.96666558 | 1.23663693  | -0.87599567 |
| H  | -2.81046157 | -2.26625604 | 1.85525090  |
| H  | -0.47841530 | -4.69357317 | 1.75106831  |
| H  | 0.49700656  | 1.78261111  | -0.33367540 |
| H  | -2.72227823 | -1.14436104 | -0.50553465 |
| N  | 1.33860136  | -3.26324027 | 0.47243830  |
| C  | 2.20282939  | -4.06756729 | 0.52660364  |

ENERGY = -1475.59014033  
 ZPVE = 0.09826227

Transition state (TS<sub>2</sub>)

|    |             |             |             |
|----|-------------|-------------|-------------|
| Mn | -0.11419777 | -1.95167777 | 0.36952190  |
| C  | 0.82438240  | -0.16525519 | 0.10685021  |
| C  | -1.39474139 | 0.36321426  | -0.60607452 |
| C  | -1.30168597 | -2.80285519 | 1.93706239  |
| C  | -2.03372956 | -1.81232017 | 1.70918336  |
| C  | -0.03671021 | 0.79819411  | -0.29936762 |
| C  | -1.79807740 | -0.88841867 | -0.23891521 |
| H  | 1.86588605  | 0.05281245  | 0.37977781  |
| H  | -2.05559999 | 1.01341535  | -1.20145162 |
| H  | -0.98098587 | -3.65074463 | 2.53078865  |
| H  | -2.84925856 | -1.12742063 | 1.89800172  |
| H  | 0.24835901  | 1.85023704  | -0.44907943 |
| H  | -2.76945469 | -1.27811324 | -0.56491457 |
| N  | 1.29313303  | -3.25642229 | 0.49974153  |
| C  | 2.14492753  | -4.07127031 | 0.59301424  |

ENERGY = -1475.57361208  
 ZPVE = 0.09829945

C<sub>6</sub>H<sub>6</sub>-MnNC product

|    |             |             |             |
|----|-------------|-------------|-------------|
| Mn | 0.21449065  | -2.00744800 | 0.56258560  |
| C  | -0.05894726 | 0.03703988  | 1.21427680  |
| C  | -1.27509161 | -0.36546837 | -0.87232318 |
| C  | -0.99319915 | -0.83230319 | 1.91902937  |
| C  | -2.09570466 | -1.38088345 | 1.20325673  |

|   |             |             |             |
|---|-------------|-------------|-------------|
| C | -0.28006782 | 0.30852423  | -0.16637577 |
| C | -2.19572260 | -1.22206206 | -0.17785283 |
| H | 0.70138782  | 0.59067348  | 1.76945881  |
| H | -1.37935795 | -0.21891491 | -1.94970859 |
| H | -0.93652830 | -0.93344387 | 3.00503426  |
| H | -2.82656090 | -1.99766578 | 1.73450405  |
| H | 0.38998585  | 0.99526219  | -0.69193750 |
| H | -2.99395723 | -1.72118639 | -0.73174997 |
| N | 1.25254349  | -3.55949176 | 0.02521705  |
| C | 1.88799843  | -4.50235728 | -0.29396362 |

ENERGY = -1475.74685784

ZPVE = 0.10630533

---

(C<sub>2</sub>H<sub>2</sub>)<sub>2</sub>-CoNC reactant

|    |             |             |             |
|----|-------------|-------------|-------------|
| Co | -0.04260718 | -1.30600103 | 0.03964951  |
| C  | 1.10079441  | -0.30991625 | 1.37077461  |
| C  | -1.41572451 | -0.62658730 | -1.29173142 |
| C  | 0.03415196  | 0.32754244  | 1.24141967  |
| C  | -1.42538173 | -1.87560096 | -1.31523881 |
| H  | 2.07792556  | -0.63544365 | 1.70413061  |
| H  | -1.69564780 | 0.38483510  | -1.56004371 |
| H  | -0.69262449 | 1.11301004  | 1.40928268  |
| H  | -1.64371827 | -2.90418859 | -1.57247531 |
| N  | 0.89222814  | -2.97382386 | 0.13239966  |
| C  | 1.46818528  | -4.00148602 | 0.18931334  |

ENERGY = -1629.99595408

ZPVE = 0.06441093

(C<sub>2</sub>H<sub>2</sub>)<sub>3</sub>-CoNC intermediate

|    |             |             |             |
|----|-------------|-------------|-------------|
| Co | -0.21355403 | -1.75019007 | 0.42138055  |
| C  | 1.14968785  | -0.34673308 | 1.20470635  |
| C  | -1.72733841 | -0.88639332 | -0.85268511 |
| C  | -1.90643953 | -2.06185933 | 2.02987105  |
| C  | -1.23304985 | -3.08107577 | 1.99869825  |
| C  | 0.05550609  | 0.22936748  | 1.24030277  |
| C  | -1.13218161 | -1.77453825 | -1.47511679 |
| H  | 2.18612204  | -0.64588566 | 1.26362735  |
| H  | -2.41981409 | -0.08535183 | -0.63664112 |
| H  | -2.60098994 | -1.25609540 | 2.19279021  |
| H  | -0.69476055 | -4.01424225 | 2.03691772  |
| H  | -0.68201838 | 1.00235017  | 1.40282632  |
| H  | -0.75849173 | -2.48809555 | -2.19508812 |
| N  | 1.04603089  | -3.16137340 | 0.10123707  |
| C  | 1.81494307  | -4.03417477 | -0.08780547 |

ENERGY = -1707.27808022

ZPVE = 0.09319743

Transition state (TS<sub>1</sub>)

|    |             |             |             |
|----|-------------|-------------|-------------|
| Co | -0.13574784 | -1.84508614 | 0.40599315  |
| C  | 0.73270479  | -0.30532729 | 1.26222017  |
| C  | -1.37057320 | -0.37937186 | -0.72000621 |
| C  | -1.84285730 | -2.23441426 | 2.06795020  |
| C  | -1.17165885 | -3.24862996 | 2.03474916  |
| C  | -0.18701902 | 0.36151202  | 0.66954368  |
| C  | -1.31559308 | -1.58758126 | -1.14313177 |
| H  | 1.57042272  | -0.19142152 | 1.94558668  |
| H  | -1.91141583 | 0.54219029  | -0.92792816 |
| H  | -2.48683386 | -1.37773798 | 2.16166316  |
| H  | -0.59854147 | -4.16164182 | 2.03151568  |
| H  | -0.57744701 | 1.37717684  | 0.63772764  |
| H  | -1.71320873 | -2.24700052 | -1.91046756 |
| N  | 1.07216600  | -3.23645342 | 0.11904037  |
| C  | 1.82625575  | -4.12794336 | -0.04794987 |

ENERGY = -1707.25063252

ZPVE = 0.09391151

Intermediate

|    |             |             |             |
|----|-------------|-------------|-------------|
| Co | -0.09901912 | -2.16534702 | -0.57029313 |
| C  | -0.02634187 | -0.43701559 | -1.49451437 |
| C  | -0.59248334 | 0.27346471  | 0.68575129  |
| C  | -0.95257359 | -3.80314351 | -2.04971977 |
| C  | -1.24968075 | -2.74359925 | -2.57598683 |
| C  | -0.27760406 | 0.62987116  | -0.69511673 |
| C  | -0.55395928 | -1.05219475 | 0.93453315  |
| H  | 0.24855755  | -0.31503200 | -2.55312265 |
| H  | -0.81354847 | 1.02396191  | 1.45757461  |
| H  | -0.73033367 | -4.76712361 | -1.62204795 |
| H  | -1.57767296 | -1.89198537 | -3.14612545 |
| H  | -0.25117883 | 1.67503029  | -1.03370620 |
| H  | -0.72183072 | -1.55776751 | 1.89172269  |
| N  | 0.36921740  | -3.71201321 | 0.43425516  |
| C  | 0.66053659  | -4.67059749 | 1.05800441  |

ENERGY = -1707.31587335

ZPVE = 0.09902157

Transition state (TS<sub>2</sub>)

|    |             |             |             |
|----|-------------|-------------|-------------|
| Co | -0.08319857 | -2.36271230 | 0.71846991  |
| C  | 0.57257562  | -0.56598393 | 1.34963393  |
| C  | -0.97780219 | -0.16274555 | -0.46824776 |
| C  | -1.87947031 | -2.87969946 | 1.61883981  |
| C  | -1.13261337 | -2.35233992 | 2.46455024  |
| C  | -0.04529730 | 0.33760857  | 0.56054760  |
| C  | -1.22439783 | -1.47043264 | -0.59472577 |
| H  | 1.25864424  | -0.26158725 | 2.15129132  |

|   |             |             |             |
|---|-------------|-------------|-------------|
| H | -1.48038195 | 0.54585482  | -1.14541016 |
| H | -2.70337588 | -3.37388372 | 1.12379039  |
| H | -0.74984341 | -1.97679987 | 3.40400690  |
| H | 0.11110142  | 1.42409582  | 0.62708108  |
| H | -1.81954689 | -2.05203356 | -1.30008881 |
| N | 0.76065495  | -3.42269795 | -0.54868230 |
| C | 1.28360456  | -4.08837329 | -1.37455008 |

ENERGY = -1707.29187399  
 ZPVE = 0.09718975

C<sub>6</sub>H<sub>6</sub>-CoNC product

|    |             |             |             |
|----|-------------|-------------|-------------|
| Co | 0.11408304  | -2.24065660 | 0.38107575  |
| C  | 0.00586665  | -0.74047160 | 1.97374931  |
| C  | -1.03708116 | -0.44415937 | -0.22510602 |
| C  | -1.90008899 | -2.13671806 | 1.31997264  |
| C  | -0.91699054 | -1.77259967 | 2.26992010  |
| C  | -0.05354413 | -0.07734538 | 0.72418239  |
| C  | -1.96032082 | -1.47200110 | 0.07408186  |
| H  | 0.78540927  | -0.48120386 | 2.69353554  |
| H  | -1.05621943 | 0.03860403  | -1.20453327 |
| H  | -2.58366701 | -2.96158888 | 1.53190864  |
| H  | -0.84700245 | -2.31173557 | 3.21722040  |
| H  | 0.68154820  | 0.69250374  | 0.47929725  |
| H  | -2.68823731 | -1.78628140 | -0.67682910 |
| N  | 0.93266307  | -3.64731715 | -0.59064646 |
| C  | 1.52796891  | -4.50053426 | -1.14772865 |

ENERGY = -1707.50659102  
 ZPVE = 0.10868226

---

(C<sub>2</sub>H<sub>2</sub>)<sub>2</sub>-NiNC reactant

|    |             |             |             |
|----|-------------|-------------|-------------|
| Ni | -0.17871135 | -2.01526477 | 1.01229742  |
| C  | 0.92437226  | -0.27784366 | 2.03184117  |
| C  | -1.52720606 | -3.24465864 | 1.59966064  |
| C  | -1.17039048 | -2.57688740 | 2.60872871  |
| C  | 1.47450642  | -0.42564547 | 0.94901267  |
| H  | 0.57212457  | -0.00138687 | 3.01158062  |
| H  | -2.05229596 | -3.98762610 | 1.00868886  |
| H  | -1.20393182 | -2.32573364 | 3.66393933  |
| H  | 1.99725127  | -0.49078361 | 0.00782945  |
| N  | 0.24796950  | -2.42953064 | -0.78525077 |
| C  | 0.52234115  | -2.66091431 | -1.90787617 |

ENERGY = -1755.52433859  
 ZPVE = 0.06554124

(C<sub>2</sub>H<sub>2</sub>)<sub>3</sub>-NiNC intermediate

|    |             |             |            |
|----|-------------|-------------|------------|
| Ni | -0.32813062 | -1.57440824 | 0.38517805 |
|----|-------------|-------------|------------|



|   |             |             |             |
|---|-------------|-------------|-------------|
| C | 1.19518881  | -0.77739116 | 1.52748809  |
| C | -1.88619458 | -0.54826110 | -0.57763729 |
| C | -1.23593177 | -3.23748220 | 1.95310441  |
| C | -1.81638798 | -2.21442843 | 2.25687256  |
| C | 0.34716021  | 0.11931953  | 1.42573395  |
| C | -1.74730752 | -1.65706956 | -1.11135201 |
| H | 2.06052798  | -1.38931112 | 1.73585457  |
| H | -2.26079464 | 0.44429862  | -0.37317665 |
| H | -0.72471351 | -4.14755708 | 1.68838413  |
| H | -2.37230098 | -1.35603694 | 2.58837423  |
| H | -0.13899670 | 1.07846017  | 1.53063091  |
| H | -1.80021536 | -2.54358004 | -1.72614722 |
| N | 0.66102865  | -3.12169082 | -0.20210250 |
| C | 1.25525305  | -4.07728141 | -0.54622563 |

ENERGY = -1832.81184233

ZPVE = 0.09317026

#### Transition state (TS<sub>i</sub>)

|    |             |             |             |
|----|-------------|-------------|-------------|
| Ni | -0.45524626 | -1.81327980 | 0.60226645  |
| C  | 0.72361434  | -0.51459570 | 1.42553561  |
| C  | -1.17961092 | -0.22526581 | -0.70032871 |
| C  | -1.87486721 | -3.01234675 | 1.63364091  |
| C  | -1.01579568 | -2.68917823 | 2.45579518  |
| C  | 0.15551611  | 0.27704987  | 0.57764120  |
| C  | -1.66325529 | -1.41243848 | -0.85859797 |
| H  | 1.50390634  | -0.47706444 | 2.18181230  |
| H  | -1.31053913 | 0.74022289  | -1.18703576 |
| H  | -2.70847998 | -3.44065743 | 1.10059633  |
| H  | -0.38661306 | -2.56713399 | 3.32282039  |
| H  | 0.25129430  | 1.32802632  | 0.30843664  |
| H  | -2.35867898 | -1.93025292 | -1.51469786 |
| N  | 0.73489928  | -3.06801640 | -0.14895020 |
| C  | 1.47450922  | -3.85679935 | -0.61242820 |

ENERGY = -1832.77233916

ZPVE = 0.09398538

#### Intermediate

|    |             |             |             |
|----|-------------|-------------|-------------|
| Ni | -0.06494007 | -1.96737136 | -0.61295914 |
| C  | -0.01886379 | -0.21921997 | -1.45839512 |
| C  | -1.00631523 | 0.35572577  | 0.58936947  |
| C  | -1.40087868 | -3.42514836 | -1.89243669 |
| C  | -1.76426234 | -2.30135435 | -2.19858527 |
| C  | -0.47965251 | 0.79895918  | -0.70618474 |
| C  | -0.90593765 | -0.96570197 | 0.79690061  |
| H  | 0.41268927  | -0.11121050 | -2.46581712 |
| H  | -1.45002625 | 1.03625143  | 1.32960061  |
| H  | -1.13132533 | -4.43464142 | -1.62805929 |
| H  | -2.17174333 | -1.36669188 | -2.54393407 |

|   |             |             |             |
|---|-------------|-------------|-------------|
| H | -0.47074897 | 1.85324501  | -1.01235909 |
| H | -1.23827204 | -1.58342917 | 1.63717587  |
| N | 0.42951091  | -3.53920367 | 0.30465597  |
| C | 0.75447927  | -4.52930981 | 0.85815384  |

ENERGY = -1832.84620930

ZPVE = 0.09949707

Transition state (TS<sub>2</sub>)

|    |             |             |             |
|----|-------------|-------------|-------------|
| Ni | -0.21256517 | -2.48342921 | -0.71945376 |
| C  | 0.54723265  | -0.72688960 | -1.33280021 |
| C  | -0.94608882 | -0.20690924 | 0.46261134  |
| C  | -1.89085212 | -2.94836083 | -1.73250219 |
| C  | -1.23766201 | -2.14963527 | -2.43523499 |
| C  | 0.01353210  | 0.23128833  | -0.55339698 |
| C  | -1.21300599 | -1.51069759 | 0.57616140  |
| H  | 1.28193446  | -0.55543106 | -2.12965860 |
| H  | -1.44444307 | 0.51460862  | 1.12609827  |
| H  | -2.66861397 | -3.62111405 | -1.39493479 |
| H  | -0.98025066 | -1.52810857 | -3.28128206 |
| H  | 0.28375635  | 1.29408605  | -0.62160569 |
| H  | -1.80990288 | -2.08452343 | 1.28669530  |
| N  | 0.76835495  | -3.20299420 | 0.64326375  |
| C  | 1.39922727  | -3.68362017 | 1.51953292  |

ENERGY = -1832.82804112

ZPVE = 0.09809506

C<sub>6</sub>H<sub>6</sub>-NiNC product

|    |             |             |             |
|----|-------------|-------------|-------------|
| Ni | -0.06099470 | -2.64362905 | 0.43902943  |
| C  | 0.03357077  | -0.67125889 | 1.87293335  |
| C  | -1.27575236 | -0.14460408 | -0.10195473 |
| C  | -1.89242518 | -2.06112553 | 1.29880241  |
| C  | -0.82859563 | -1.74975083 | 2.18265998  |
| C  | -0.22754974 | 0.16191061  | 0.76843969  |
| C  | -2.06733724 | -1.28595614 | 0.12802355  |
| H  | 0.88001990  | -0.45628648 | 2.53012044  |
| H  | -1.45822738 | 0.47218554  | -0.98535078 |
| H  | -2.58479825 | -2.87551009 | 1.52645138  |
| H  | -0.68596678 | -2.31939030 | 3.10439598  |
| H  | 0.41886166  | 1.02109451  | 0.57329606  |
| H  | -2.86000840 | -1.55082212 | -0.57632859 |
| N  | 1.11760639  | -3.53574326 | -0.66509503 |
| C  | 1.87115351  | -4.10513430 | -1.37117329 |

ENERGY = -1833.03847402

ZPVE = 0.10814122

---

(C<sub>2</sub>H<sub>2</sub>)<sub>2</sub>-Sc<sup>+</sup>(H<sub>2</sub>O)<sub>8</sub> reactant

|    |             |             |             |
|----|-------------|-------------|-------------|
| Sc | -0.02283275 | -1.27068498 | -0.26782161 |
| C  | -1.75850524 | -2.46496433 | -0.62959776 |
| C  | -1.56545822 | -2.02523749 | 1.84848974  |
| C  | -0.35463109 | -1.39731782 | 1.81471854  |
| C  | -2.28122991 | -2.51297470 | 0.63422048  |
| H  | -2.37126265 | -2.85006234 | -1.45624745 |
| H  | -2.09462094 | -2.20198891 | 2.79793731  |
| H  | 0.09700273  | -1.08700732 | 2.76609509  |
| H  | -3.28672744 | -2.92212985 | 0.82634357  |
| H  | 3.93307859  | -5.82357257 | -0.94636295 |
| H  | 3.79989273  | -7.42821843 | -0.67984107 |
| H  | 4.41624655  | -3.83980132 | -0.51117204 |
| H  | 3.98900311  | -4.02880261 | -2.00184444 |
| H  | 2.80168134  | -3.93319184 | 1.06012980  |
| H  | 3.69316962  | -2.60769743 | 1.55816930  |
| H  | 2.43191352  | -2.34504300 | -0.11173802 |
| H  | 1.95299079  | -2.57631605 | -1.72157514 |
| H  | 1.85237412  | -4.44582476 | -2.56457339 |
| H  | 2.32122721  | -3.28922918 | -3.68160360 |
| H  | 1.99210489  | -6.23838113 | -1.71894993 |
| H  | 0.56317979  | -5.58475249 | -1.48422188 |
| H  | 2.55592123  | -5.87646404 | 0.67455971  |
| H  | 1.15622383  | -5.16634931 | 0.93241960  |
| H  | -0.88398679 | -4.33856652 | -0.10281457 |
| H  | -1.03820522 | -5.85850410 | 0.27281484  |
| O  | 3.30364122  | -6.59150610 | -0.68572754 |
| O  | 4.54027291  | -4.42883891 | -1.29034397 |
| O  | 3.31081000  | -3.04356484 | 0.77663898  |
| O  | 1.71368101  | -2.03601640 | -0.83724866 |
| O  | 2.34349609  | -3.51419285 | -2.73512939 |
| O  | 1.28248766  | -5.68565422 | -2.15227395 |
| O  | 2.10025546  | -5.17358996 | 1.21728549  |
| O  | -0.39008463 | -5.18841344 | -0.01348410 |

ENERGY = -1526.08933270

ZPVE = 0.26158457

#### Intermediate

|    |             |             |             |
|----|-------------|-------------|-------------|
| Sc | -0.10290986 | -1.17248980 | -0.19171128 |
| C  | -1.83201218 | -2.24269005 | -0.87967959 |
| C  | -1.96999883 | -1.96935885 | 1.62882195  |
| C  | -1.11479868 | 1.11480941  | -1.11518351 |
| C  | -0.70815619 | 1.41749213  | -0.01009183 |
| C  | -2.53324324 | -2.31601219 | 0.29603045  |
| C  | -0.72740890 | -1.43205288 | 1.81884923  |
| H  | -2.36471971 | -2.52355442 | -1.79947814 |
| H  | -2.64533886 | -2.16834518 | 2.47601119  |
| H  | -1.50854696 | 0.91161269  | -2.10064558 |
| H  | -0.37552046 | 1.74114862  | 0.96565097  |
| H  | -3.58674792 | -2.64061883 | 0.31716027  |

|   |             |             |             |
|---|-------------|-------------|-------------|
| H | -0.41670105 | -1.22755127 | 2.85247608  |
| H | 3.83359376  | -5.67361498 | -0.98205228 |
| H | 3.63182341  | -7.29124312 | -0.90765242 |
| H | 4.33048798  | -3.77587840 | -0.28336048 |
| H | 4.04684755  | -3.78669264 | -1.82047167 |
| H | 2.58909579  | -3.96436216 | 1.11438084  |
| H | 3.48385704  | -2.75932372 | 1.83932840  |
| H | 2.36350455  | -2.24328366 | 0.07651955  |
| H | 2.04607599  | -2.28093177 | -1.56870257 |
| H | 1.98395109  | -4.04948841 | -2.64767797 |
| H | 2.61811205  | -2.81963470 | -3.57938941 |
| H | 1.96859953  | -5.93132172 | -1.98767193 |
| H | 0.54673311  | -5.24696441 | -1.82256697 |
| H | 2.29834044  | -5.84440650 | 0.48273506  |
| H | 0.91126930  | -5.09319235 | 0.67070813  |
| H | -1.00019385 | -4.08542647 | -0.48618232 |
| H | -1.21804028 | -5.62402459 | -0.23713198 |
| O | 3.16018095  | -6.44135375 | -0.87132834 |
| O | 4.51740272  | -4.28038119 | -1.10887406 |
| O | 3.15599845  | -3.08098244 | 0.98177817  |
| O | 1.72463765  | -1.85490318 | -0.66424311 |
| O | 2.52203554  | -3.13499240 | -2.66419939 |
| O | 1.32365074  | -5.31016789 | -2.42782506 |
| O | 1.81464954  | -5.18584002 | 1.05488853  |
| O | -0.53190220 | -4.95457281 | -0.41580391 |

ENERGY = -1603.39466345

ZPVE = 0.29040540

#### Transition state

|    |             |             |             |
|----|-------------|-------------|-------------|
| Sc | -0.09701002 | -1.15404014 | -0.34728693 |
| C  | -1.86266108 | -2.25135380 | -0.94978209 |
| C  | -1.93750975 | -1.84876538 | 1.53172081  |
| C  | -0.84234986 | 1.04687836  | -0.72207898 |
| C  | -1.04155170 | 1.09180575  | 0.49892651  |
| C  | -2.51937338 | -2.31575474 | 0.24915811  |
| C  | -0.85050684 | -1.02119588 | 1.64972742  |
| H  | -2.39964860 | -2.62109868 | -1.83456512 |
| H  | -2.45266285 | -2.21828960 | 2.43321856  |
| H  | -0.80329209 | 1.45663684  | -1.72742274 |
| H  | -1.26123720 | 1.40774437  | 1.50751306  |
| H  | -3.53474774 | -2.73639687 | 0.33881127  |
| H  | -0.54004691 | -0.71170450 | 2.65616339  |
| H  | 3.83988563  | -5.70010771 | -0.94619537 |
| H  | 3.63552610  | -7.31367962 | -0.81076274 |
| H  | 4.34521965  | -3.77894606 | -0.32859919 |
| H  | 4.05779609  | -3.85026324 | -1.86393074 |
| H  | 2.63172263  | -3.90394855 | 1.10287257  |
| H  | 3.56386474  | -2.69532838 | 1.76601287  |
| H  | 2.39565599  | -2.21591824 | -0.01494852 |

|   |             |             |             |
|---|-------------|-------------|-------------|
| H | 2.06694051  | -2.32683175 | -1.64737421 |
| H | 1.98674374  | -4.12878352 | -2.66134755 |
| H | 2.61504570  | -2.94358196 | -3.64913344 |
| H | 1.96366333  | -5.98627892 | -1.91682932 |
| H | 0.54653136  | -5.28959576 | -1.76475726 |
| H | 2.32373113  | -5.81365419 | 0.54299566  |
| H | 0.93634329  | -5.06290429 | 0.71349577  |
| H | -1.04895084 | -4.13783153 | -0.44084037 |
| H | -1.19357773 | -5.68056845 | -0.17027001 |
| O | 3.16628154  | -6.46176337 | -0.79726650 |
| O | 4.52669269  | -4.31752070 | -1.13365434 |
| O | 3.19760018  | -3.03309480 | 0.93057060  |
| O | 1.74789765  | -1.87160046 | -0.75862037 |
| O | 2.53008929  | -3.22278940 | -2.72110585 |
| O | 1.31706340  | -5.37887378 | -2.37332520 |
| O | 1.84265614  | -5.13413974 | 1.09275373  |
| O | -0.54033904 | -4.97958301 | -0.35208775 |

ENERGY = -1603.38853118

ZPVE = 0.29065139

C<sub>6</sub>H<sub>6</sub>-Sc<sup>+</sup>(H<sub>2</sub>O)<sub>8</sub> product

|    |             |             |             |
|----|-------------|-------------|-------------|
| Sc | -0.11352771 | -1.87636362 | 0.46840164  |
| C  | -1.52598625 | -2.19150641 | -1.20703995 |
| C  | -2.40046512 | -1.03104515 | 0.79366473  |
| C  | -0.93380229 | -0.90377799 | -1.60960496 |
| C  | -0.84979199 | 0.13682146  | -0.71152335 |
| C  | -2.49473078 | -2.06932446 | -0.10527957 |
| C  | -1.34017803 | -0.02324818 | 0.65968503  |
| H  | -1.71273045 | -2.94353620 | -1.97772480 |
| H  | -3.08064911 | -0.98205897 | 1.64954572  |
| H  | -0.49506995 | -0.80284304 | -2.60702026 |
| H  | -0.33957181 | 1.06325443  | -0.99146958 |
| H  | -3.25143931 | -2.84781870 | 0.03159680  |
| H  | -1.33800631 | 0.83958240  | 1.32818249  |
| H  | 3.52485710  | -5.67896061 | -1.69842921 |
| H  | 3.10205679  | -7.14229307 | -2.26197155 |
| H  | 4.45624839  | -4.11361918 | -0.55099224 |
| H  | 4.03195910  | -3.59640366 | -1.96520610 |
| H  | 2.91095484  | -4.36331153 | 0.95360278  |
| H  | 4.04850290  | -3.76907098 | 1.93214207  |
| H  | 2.69265933  | -2.38181261 | 0.58952995  |
| H  | 2.28094052  | -1.86484269 | -0.87656213 |
| H  | 1.97693045  | -3.10143874 | -2.55846775 |
| H  | 2.71651623  | -1.80186977 | -3.17144807 |
| H  | 1.64505648  | -5.33745559 | -2.36802782 |
| H  | 0.19254761  | -4.62521482 | -2.59294087 |
| H  | 1.85815929  | -6.04892185 | 0.01241055  |
| H  | 1.28678949  | -4.73329660 | -0.54666801 |
| H  | -0.72662480 | -3.97485793 | 2.32295410  |

|   |             |             |             |
|---|-------------|-------------|-------------|
| H | 0.49233236  | -4.44867315 | 1.37025914  |
| O | 2.76515980  | -6.36035410 | -1.79200858 |
| O | 4.38892183  | -4.38396338 | -1.49476719 |
| O | 3.62723717  | -3.67550487 | 1.05955773  |
| O | 1.98235206  | -1.88690343 | 0.08470525  |
| O | 2.65426424  | -2.38211078 | -2.39278155 |
| O | 1.09768729  | -4.48729718 | -2.26335029 |
| O | 1.54017545  | -5.16797350 | 0.31774537  |
| O | -0.01666857 | -3.66357234 | 1.73575333  |

ENERGY = -1603.54925997

ZPVE = 0.30150535

-----  
(C<sub>2</sub>H<sub>2</sub>)<sub>2</sub>-Ti<sup>+</sup>(H<sub>2</sub>O)<sub>8</sub> reactant

|    |             |             |             |
|----|-------------|-------------|-------------|
| H  | 3.85784485  | -5.08351557 | -1.93500175 |
| H  | 3.96706963  | -6.51229444 | -2.71753723 |
| H  | 4.21127392  | -3.66583282 | -0.45059911 |
| H  | 3.41771264  | -3.06698589 | -1.65430477 |
| H  | 3.19036175  | -5.06576218 | 0.96879722  |
| H  | 4.06228414  | -4.06608961 | 1.98434066  |
| H  | 2.29614045  | -3.21628342 | 1.11561119  |
| H  | 1.43984355  | -2.57099967 | -0.18225738 |
| H  | 1.26547829  | -3.61434737 | -1.94936944 |
| H  | 1.27951619  | -1.96810583 | -2.23306050 |
| H  | 1.81955441  | -5.48224450 | -2.40080843 |
| H  | 0.48442592  | -5.46673045 | -1.53958087 |
| H  | 3.08320486  | -6.43527286 | -0.48453855 |
| H  | 1.76907901  | -6.43512940 | 0.40853930  |
| H  | -0.44560922 | -5.61040866 | 0.64144246  |
| H  | -0.54198137 | -7.04122393 | -0.00637599 |
| O  | 3.41944684  | -5.99717647 | -2.10020160 |
| O  | 4.18576148  | -3.64352171 | -1.43510047 |
| O  | 3.46735330  | -4.07111377 | 1.21449138  |
| O  | 1.40618044  | -2.70708345 | 0.86417283  |
| O  | 1.59423750  | -2.65896598 | -1.62453577 |
| O  | 0.96489334  | -4.98767961 | -2.25425999 |
| O  | 2.74830137  | -6.33256648 | 0.45023088  |
| O  | 0.00568917  | -6.23535471 | 0.03268772  |
| Ti | -0.22185173 | -2.68777438 | 1.94862996  |
| C  | -0.58885772 | -1.29601706 | 3.68905924  |
| C  | -1.73038778 | -3.90015738 | 1.48106218  |
| C  | -1.05420157 | -4.40898593 | 2.50420241  |
| C  | -1.22116427 | -0.82008106 | 2.73215080  |
| H  | -0.16721140 | -1.45208333 | 4.67820275  |
| H  | -2.62454231 | -4.17647113 | 0.90775098  |
| H  | -1.14241207 | -5.29174459 | 3.15034151  |
| H  | -1.85538168 | -0.18145007 | 2.12349140  |

ENERGY = -1614.75315261

ZPVE = 0.25646245

Intermediate

|    |             |             |             |
|----|-------------|-------------|-------------|
| Ti | 0.24991475  | -0.67677797 | -0.77838593 |
| C  | -0.62269736 | -0.67653368 | 1.07260172  |
| C  | -2.31165108 | -1.60362153 | -0.48264003 |
| C  | 0.21615235  | 1.36370294  | -1.53259411 |
| C  | -0.67699082 | 0.85826080  | -2.24262787 |
| C  | -1.89263023 | -1.13124827 | 0.84817460  |
| C  | -1.41938827 | -1.61408652 | -1.53135234 |
| H  | -0.33466557 | -0.33071342 | 2.07413456  |
| H  | -3.36495726 | -1.89949564 | -0.60392014 |
| H  | 0.85315915  | 2.17796678  | -1.18697330 |
| H  | -1.46978674 | 0.71771444  | -2.96558159 |
| H  | -2.64980602 | -1.15567134 | 1.64672713  |
| H  | -1.76770932 | -1.93537908 | -2.52310921 |
| O  | 2.91215456  | -6.30405971 | -0.73650026 |
| O  | 4.47738028  | -4.29874151 | -1.05057168 |
| O  | 3.06866327  | -2.82426776 | 0.83979759  |
| O  | 1.89331412  | -1.63812871 | -0.97525240 |
| O  | 2.68701524  | -3.10044932 | -2.81005356 |
| O  | 1.27473731  | -5.11771921 | -2.46188900 |
| O  | 1.59967793  | -4.81187675 | 1.02784906  |
| O  | -0.63461265 | -4.46624924 | -0.56843898 |
| H  | 3.66122270  | -5.61372961 | -0.86435264 |
| H  | 3.29904479  | -7.19548517 | -0.68982666 |
| H  | 4.29063813  | -3.71016292 | -0.28408672 |
| H  | 4.11580170  | -3.82291412 | -1.83335220 |
| H  | 2.43222195  | -3.66719248 | 1.01842851  |
| H  | 3.36302186  | -2.42895597 | 1.67908340  |
| H  | 2.43357969  | -2.04416686 | -0.13302868 |
| H  | 2.23765186  | -2.16347229 | -1.83898153 |
| H  | 2.05981799  | -3.96072769 | -2.75341296 |
| H  | 2.82995632  | -2.84009538 | -3.73678985 |
| H  | 1.83395962  | -5.76593164 | -1.94858473 |
| H  | 0.48309969  | -4.93378939 | -1.90221246 |
| H  | 2.05203606  | -5.54717516 | 0.52516676  |
| H  | 0.71909685  | -4.67958882 | 0.60236558  |
| H  | -0.98927969 | -3.55522166 | -0.69784353 |
| H  | -1.40514501 | -5.04703324 | -0.42729431 |

ENERGY = -1692.11152348

ZPVE = 0.28893764

Transition state

|    |             |             |             |
|----|-------------|-------------|-------------|
| Ti | 0.21405218  | -0.84737778 | -0.88057264 |
| C  | -0.52388953 | -1.02040057 | 0.96802999  |
| C  | -2.31105095 | -1.37941042 | -0.70118190 |
| C  | -0.21045010 | 1.69267051  | -0.83288220 |
| C  | -0.60548071 | 1.37805542  | -1.94065903 |

|   |             |             |             |
|---|-------------|-------------|-------------|
| C | -1.86837737 | -1.03945063 | 0.64428988  |
| C | -1.40231178 | -1.74699774 | -1.68275061 |
| H | -0.21732034 | -0.84396386 | 2.00830271  |
| H | -3.38777164 | -1.28410048 | -0.90841243 |
| H | 0.11397373  | 2.06663435  | 0.12691056  |
| H | -0.97492775 | 1.18286827  | -2.93601105 |
| H | -2.64840242 | -0.76289161 | 1.36943327  |
| H | -1.77454790 | -2.04943225 | -2.67199308 |
| O | 2.92167996  | -6.30949551 | -0.53851610 |
| O | 4.49412773  | -4.35761956 | -1.08027778 |
| O | 3.17359733  | -2.70366410 | 0.70912930  |
| O | 1.92690290  | -1.66575823 | -1.15376951 |
| O | 2.63965470  | -3.30512338 | -2.86891644 |
| O | 1.25760475  | -5.30089623 | -2.34943955 |
| O | 1.65897012  | -4.62442556 | 1.09120305  |
| O | -0.54989737 | -4.35068320 | -0.52644928 |
| H | 3.67324933  | -5.64279995 | -0.74840980 |
| H | 3.30213913  | -7.19552824 | -0.41005501 |
| H | 4.33635682  | -3.70352206 | -0.36122841 |
| H | 4.09893788  | -3.94992624 | -1.88507016 |
| H | 2.51940986  | -3.51388950 | 0.97186119  |
| H | 3.49614781  | -2.24765704 | 1.50580913  |
| H | 2.50678259  | -1.99711248 | -0.30921773 |
| H | 2.22810824  | -2.27750246 | -1.97816296 |
| H | 2.01979149  | -4.16769432 | -2.72814980 |
| H | 2.76782486  | -3.12951298 | -3.81735495 |
| H | 1.82512049  | -5.89408110 | -1.78131734 |
| H | 0.47018706  | -5.06605100 | -1.80007868 |
| H | 2.08724358  | -5.41546576 | 0.65829699  |
| H | 0.78336715  | -4.50085113 | 0.64861153  |
| H | -0.77625312 | -3.42370405 | -0.80608184 |
| H | -1.38929781 | -4.77433845 | -0.26917414 |

ENERGY = -1692.10321753

ZPVE = 0.28883045

C<sub>6</sub>H<sub>6</sub>-Ti<sup>+</sup>(H<sub>2</sub>O)<sub>8</sub> product

|    |             |             |             |
|----|-------------|-------------|-------------|
| Ti | 0.21548960  | -0.97518701 | -0.88117060 |
| C  | -0.94298971 | 0.06816242  | 0.76813090  |
| C  | -1.90623483 | -1.45202241 | -0.93519474 |
| C  | -0.50781477 | 0.97064602  | -0.28024379 |
| C  | -1.04628223 | 0.78148593  | -1.60444326 |
| C  | -1.63930252 | -1.10195716 | 0.44940431  |
| C  | -1.69681161 | -0.41168565 | -1.93830107 |
| H  | -0.65791682 | 0.26875742  | 1.80395290  |
| H  | -2.57730764 | -2.28111258 | -1.17242882 |
| H  | 0.03022136  | 1.88553096  | -0.02778856 |
| H  | -0.82816354 | 1.51647144  | -2.38395311 |
| H  | -1.89139456 | -1.81337546 | 1.24069105  |
| H  | -2.01553940 | -0.59362727 | -2.96779623 |



|   |             |             |             |
|---|-------------|-------------|-------------|
| O | 2.93953966  | -6.34511134 | -0.45793318 |
| O | 4.54511453  | -4.46451089 | -1.12509587 |
| O | 3.38274365  | -2.69037395 | 0.66409179  |
| O | 1.95852162  | -1.80816452 | -1.18656187 |
| O | 2.67439288  | -3.44500772 | -2.91739288 |
| O | 1.26445359  | -5.40505066 | -2.29032230 |
| O | 1.76623763  | -4.54966131 | 1.11244003  |
| O | -0.52977855 | -4.25900892 | -0.49022969 |
| H | 3.70024838  | -5.70466346 | -0.71669728 |
| H | 3.30519005  | -7.23229088 | -0.29713281 |
| H | 4.44293291  | -3.77194207 | -0.43248473 |
| H | 4.14649612  | -4.07646174 | -1.93756842 |
| H | 2.73082697  | -3.45230286 | 0.97947668  |
| H | 3.78523466  | -2.23476780 | 1.42377087  |
| H | 2.61927042  | -2.02704950 | -0.40014505 |
| H | 2.26231623  | -2.40816488 | -2.00614008 |
| H | 2.05850569  | -4.29195878 | -2.75280696 |
| H | 2.79377866  | -3.28601017 | -3.87005219 |
| H | 1.83088602  | -5.97651115 | -1.69814078 |
| H | 0.49724914  | -5.11668164 | -1.74512147 |
| H | 2.16443882  | -5.37362655 | 0.71276424  |
| H | 0.91262563  | -4.40234665 | 0.64635064  |
| H | -0.88067266 | -3.39615307 | -0.82722159 |
| H | -1.29542590 | -4.75606109 | -0.14555632 |

ENERGY = -1692.22672126

ZPVE = 0.29900533

-----  
C<sub>2</sub>H<sub>2</sub>

|   |            |            |             |
|---|------------|------------|-------------|
| C | 0.00000000 | 0.00000000 | -0.60451311 |
| C | 0.00000000 | 0.00000000 | 0.60451311  |
| H | 0.00000000 | 0.00000000 | -1.67998283 |
| H | 0.00000000 | 0.00000000 | 1.67998283  |

ENERGY = -77.26885621

ZPVE = 0.02377147
